# Supplementary material for: Multiply engaged molecular gears composed of a cerium(iv) double-decker of a triptycene-functionalized porphyrin
Source: Royal Society of Chemistry journal article supplement (doi:10.1039/d3dt02443a), 2023-01-01
Supplement: d3dt02443a1.pdf [file d3dt02443a1.pdf]

Supplementary Information for  
**Multiply Engaged Molecular Gear composed of Cerium (IV) Double-  
Decker of a triptycene-functionalized Porphyrin**

Toshio Nishino,<sup>\*,[a]</sup> Masafumi Fukumura,<sup>[a]</sup> Shohei Katao,<sup>[a]</sup> Kazuma Yasuhara,<sup>[a,b]</sup> and  
Gwénaél Rapenne<sup>\*,[a,c]</sup>

<sup>[a]</sup>Division of Materials Science, Nara Institute of Science and Technology, 8916-5 Takayama, Ikoma, Nara, Japan.

<sup>[b]</sup>Centre of Digital Green-Innovation, Nara Institute of Science and Technology, 8916-5 Takayama, Ikoma, Nara, Japan.

<sup>[c]</sup>CEMES, Université de Toulouse, CNRS, 29, rue Jeanne Marvig, 31055 Toulouse, France.

\*E-mail: gwenael-rapenne@ms.naist.jp

|              |                                                                                           |
|--------------|-------------------------------------------------------------------------------------------|
| Page S2:     | General Information                                                                       |
| Page S3–S11  | Synthesis of compounds                                                                    |
| Page S12     | MALDI-TOF MS spectrum of Ce(L) <sub>2</sub> and Ce(3) <sub>2</sub> ( <b>Figure S1</b> )   |
| Page S13     | Full assignment of <sup>1</sup> H-NMR spectrum of Ce(L) <sub>2</sub> ( <b>Figure S2</b> ) |
| Page S14     | VT <sup>1</sup> H-NMR spectra of Ce(L) <sub>2</sub> ( <b>Figure S3</b> )                  |
| Page S15     | VT <sup>1</sup> H-NMR spectra of Ce(3) <sub>2</sub> ( <b>Figure S4</b> )                  |
| Page S16–S24 | <sup>1</sup> H and <sup>13</sup> C NMR spectra of compounds ( <b>Figure S5 – S13</b> )    |
| Page S25     | COSY spectrum of Ce(L) <sub>2</sub> ( <b>Figure S14</b> )                                 |
| Page S26     | NOESY spectrum of Ce(L) <sub>2</sub> ( <b>Figure S15</b> )                                |
| Page S27–S28 | X-ray crystallography of Ce(L) <sub>2</sub> ( <b>Table S1 and Figure S16</b> )            |
| Page S29     | References                                                                                |

## General informations

Synthetic procedures were carried out under dry nitrogen atmosphere, unless otherwise specified. All reagents and solvents were purchased at the highest commercial quality available and used without further purification, unless otherwise stated. Trifluoroacetic acid, chloroform, copper iodide, methanol, *N*-bromosuccinimide, and zinc acetate dihydrate were purchased from FUJIFILM Wako Pure Chemical Corporation. Tris(acetylacetonato)cerium hydrate was purchased from Aldrich. Dichloromethane, 2,3-dichloro-5,6-dicyano-*p*-benzoquinone (DDQ), anhydrous tetrahydrofuran and triethylamine were purchased from Nacalaitesque. Pyrrole and bis(triphenylphosphine) palladium(II)dichloride were purchased from TCI. 9-Ethynyltritycene,<sup>[1]</sup> Dipyrromethanes,<sup>[2]</sup> and 3,5-dibutoxybenzaldehyde<sup>[3]</sup> were prepared according to the literature procedures. The complexation reaction of a porphyrin with zinc ion and cerium ion under microwave irradiation was carried out by utilizing CEM Discover SP in a glass pressure tube equipped with PTFE-coated magnetic stirring bar. <sup>1</sup>H, and <sup>13</sup>C spectra were recorded on a JEOL JNM-ECA600 (600 MHz for <sup>1</sup>H; 150 MHz for <sup>13</sup>C) spectrometer or a JEOL JNM-ECX400P (400 MHz for <sup>1</sup>H; 100 MHz for <sup>13</sup>C) spectrometer at a constant temperature of 298 K. Tetramethylsilane (TMS) was used as an internal reference for <sup>1</sup>H and <sup>13</sup>C NMR measurements in CDCl<sub>3</sub>, DMSO-*d*<sub>6</sub>, and toluene-*d*<sub>8</sub>. Chemical shifts ( $\delta$ ) are reported in ppm. Coupling constants (*J*) are given in Hz and the following abbreviations have been used to describe the signals: singlet (s); broad singlet (br. s); doublet (d); triplet (t); quadruplet (q); quintuplet (quint); multiplet (m). Full assignments of <sup>1</sup>H and <sup>13</sup>C NMR spectra were made with the assistance of COSY, NOESY, HMBC, and HSQC spectra when necessary. The MALDI-TOF mass spectrometry was performed using JEOL JMS-S300 spectrometer. Silica gel column chromatography and thin-layer (TLC) chromatography were performed using Wakosil® 60 and Merck silica gel 60 (F254) TLC plates, respectively.

## Synthesis of porphyrin H<sub>2</sub>1

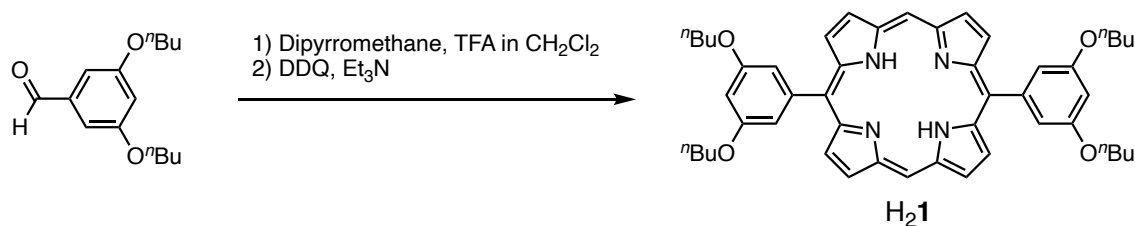

This reaction was performed under N<sub>2</sub> atmosphere and all the reaction vessels were dried up. 3,5-Dibutoxybenzaldehyde (2.51g, 10 mmol) and dipyrromethane (1.48 g, 10 mmol) was dissolved in CH<sub>2</sub>Cl<sub>2</sub> (1000 mL) and the reaction vessels were protected from light by covering with aluminum foil. The resulting solution was deoxygenated by bubbling N<sub>2</sub> for 20 min. TFA (1.4 mL, 18 mmol) was added to the solution and the reaction mixture was stirred at room temperature for 30 min. Then, DDQ (3.41 g, 15 mmol) and Et<sub>3</sub>N (2.4 mL, 20 mmol) was added. The reaction mixture was stirred at room temperature for an additional period of 30 min and then, silica gel (60 mL) was added. The resulting mixture was evaporated and the crude compound was purified by silica gel column chromatography (6φ × 16 cm, hexane : CH<sub>2</sub>Cl<sub>2</sub> = 3 : 7) to afford crude purple solid, which was further purified by washing with acetone to afford H<sub>2</sub>1 as a purple solid (1.55 g, 41%).

<sup>1</sup>H NMR (400 MHz, CDCl<sub>3</sub>/TMS): δ = 10.30 (s, 2H), 9.38 (d, *J* = 4.4 Hz, 4H), 9.19 (d, *J* = 4.4 Hz, 4H), 7.43 (d, *J* = 2.8 Hz, 4H), 6.92 (t, *J* = 2.2 Hz, 2H), 4.16 (t, *J* = 6.6 Hz, 8H), 1.88 (tt, *J* = 7.1, 7.1 Hz, 8H), 1.57 (tq, *J* = 7.5, 7.5 Hz, 9H, including H<sub>2</sub>O), 1.01 (t, *J* = 7.4 Hz, 12H) -3,16 (s, 2H).

<sup>13</sup>C NMR (100 MHz, CDCl<sub>3</sub>/TMS): δ = 158.6, 146.9, 145.2, 143.1, 131.5, 131.1, 119.0, 114.5, 105.2, 100.9, 68.1, 31.4, 19.3, 13.9.

HR-MS (MALDI, DCTB): *m/z* = 750.4152, calcd. for C<sub>48</sub>H<sub>54</sub>N<sub>4</sub>O<sub>4</sub> [M]<sup>+</sup>: 750.4145.

## Synthesis of porphyrin Zn1

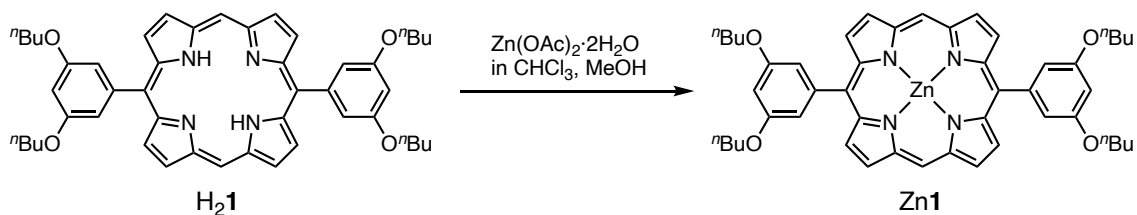

A mixture of CHCl<sub>3</sub> (10 mL) and MeOH (10 mL) containing porphyrin H<sub>2</sub>1 (755 mg, 1.0 mmol) and Zn(OAc)<sub>2</sub>·2H<sub>2</sub>O (441 mg, 2.0 mmol) was added to the pressure tube. The resulting mixture was heated under microwave irradiation at 100 °C for 20 min. After finishing the reaction, the mixture was diluted with CH<sub>2</sub>Cl<sub>2</sub> (150 mL). The organic phase was washed with H<sub>2</sub>O (100 mL) and brine (100 mL), dried over anhydrous Na<sub>2</sub>SO<sub>4</sub>, filtered and evaporated to afford Zn1 as a purple solid (806 mg, quant.).

<sup>1</sup>H NMR (400 MHz, CDCl<sub>3</sub>/TMS): δ = 10.10 (d, *J* = 4.8 Hz, 2H), 9.21 (d, *J* = 4.4 Hz, 4H), 8.42 (d, *J* = 7.2 Hz, 6H), 7.43 (d, *J* = 2.4 Hz, 4H), 6.92 (t, *J* = 2.2 Hz, 2H), 4.15 (t, *J* = 6.4 Hz, 8H), 1.87 (tt, *J* = 7.1, 7.1 Hz, 8H), 1.55 (tq, *J* = 7.4, 7.4 Hz, 8H), 1.00 (t, *J* = 7.6 Hz, 12H).

<sup>13</sup>C NMR (100 MHz, CDCl<sub>3</sub>/TMS): δ = 158.3, 149.9, 149.5, 144.3, 132.6, 131.6, 120.0, 114.4, 106.2, 100.8, 68.0, 31.5, 19.3, 13.9.

HR-MS (MALDI, DCTB): *m/z* = 812.3280, calcd for H<sub>48</sub>H<sub>52</sub>N<sub>4</sub>O<sub>4</sub>Zn [M]<sup>+</sup>: 812.3280.

## Synthesis of porphyrin Zn2

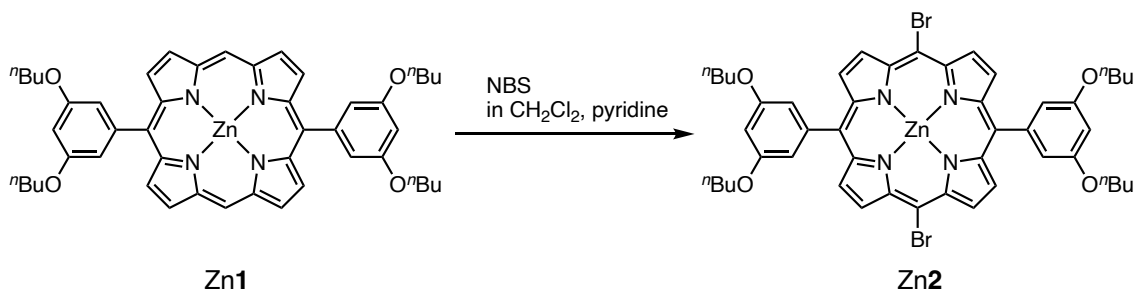

Zinc porphyrin **Zn1** (808 mg, 1.0 mmol) was dissolved in a mixture of CH<sub>2</sub>Cl<sub>2</sub> (200 mL) and pyridine (4.0 mL) under N<sub>2</sub>. After cooling the solution to -20 °C, NBS (357 mg, 2.0 mmol) was added to the mixture and the resulting solution was stirred at -20 °C for 12 hrs. Acetone (15 mL) was then added to quench the reaction and the volatiles were evaporated off. The residue was washed with MeOH to afford **Zn2** as a purple solid (930 mg, 96%).

<sup>1</sup>H NMR (400 MHz, DMSO-*d*<sub>6</sub>/TMS): δ = 9.61 (d, *J* = 4.4 Hz, 4H), 8.91 (d, *J* = 4.8 Hz, 4H), 7.27 (d, *J* = 2.0 Hz, 4H), 6.97 (t, *J* = 2.0 Hz, 2H), 4.17 (t, *J* = 6.2 Hz, 8H), 1.80 (tt, *J* = 7.0, 7.0 Hz, 8H), 1.50 (tq, *J* = 7.4, 7.4 Hz, 8H), 0.96 (t, *J* = 7.2 Hz, 12H).

<sup>13</sup>C NMR (100 MHz, CDCl<sub>3</sub> : pyridine-*d*<sub>5</sub> = 9 : 1 (v/v)/TMS): δ = 158.1, 150.5, 150.1, 144.4, 133.3, 132.8, 121.7, 114.6, 104.7, 100.5, 68.0, 31.4, 19.3, 13.9.

HR-MS (MALDI, DCTB): *m/z* = 968.1443, calcd for C<sub>48</sub>H<sub>50</sub>N<sub>4</sub>O<sub>4</sub>ZnBr<sub>2</sub> [M]<sup>+</sup>: 968.1490.

## Synthesis of porphyrin ZnL

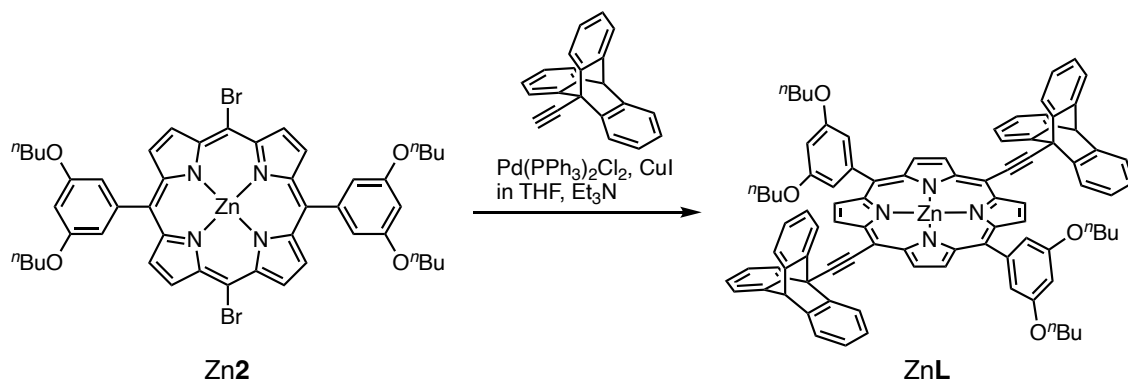

Zinc porphyrin **Zn2** (797 mg, 820  $\mu$ mol), 9-ethynyltriptycene (688 mg, 2.5 mmol), Pd(PPh<sub>3</sub>)<sub>2</sub>Cl<sub>2</sub> (58 mg, 82  $\mu$ mol) and CuI (19 mg, 100  $\mu$ mol) were suspended in a mixture of THF and Et<sub>3</sub>N (4 : 1 (v/v), 40 mL). The resulting mixture was degassed by three successive freeze-pump-thaw cycles and refluxed for 3 hrs. The reaction mixture was filtered through Celite and the filtrate was evaporated. The crude compound was purified by silica gel column chromatography (4 $\phi$   $\times$  14 cm, hexane : CH<sub>2</sub>Cl<sub>2</sub> = 5 : 5 – 4 : 6) to afford a crude green solid, which was further purified by reprecipitation of a CH<sub>2</sub>Cl<sub>2</sub> solution with MeOH to afford **ZnL** as a green solid (1.08 g, 96%).

<sup>1</sup>H NMR (400 MHz, CDCl<sub>3</sub>/TMS):  $\delta$  = 10.10 (d,  $J$  = 4.8 Hz, 4H), 9.21 (d,  $J$  = 4.4 Hz, 4H), 8.42 (d,  $J$  = 7.2 Hz, 6H), 7.56 (dd,  $J$  = 1.4, 7.6 Hz, 6H), 7.43 (d,  $J$  = 2.4 Hz, 4H), 7.26–7.21 (m, 6H), 7.19–7.16 (m, 6H), 6.91 (t,  $J$  = 2.2 Hz, 2H), 5.64 (s, 2H), 4.16 (t,  $J$  = 6.6 Hz, 8H), 1.87 (tt,  $J$  = 7.1, 7.1 Hz, 8H), 1.60–1.51 (m, 38 H, including H<sub>2</sub>O), 1.00 (t,  $J$  = 7.6 Hz, 12H).

<sup>13</sup>C NMR (100 MHz, CDCl<sub>3</sub>/TMS):  $\delta$  = 158.4, 152.5, 150.3, 145.1, 144.7, 143.7, 133.5, 131.4, 126.0, 125.6, 123.8, 123.0, 122.9, 114.3, 101.2, 101.1, 94.9, 91.3, 68.1, 54.9, 53.5, 31.4, 19.3, 13.9.

HR-MS (MALDI, DCTB):  $m/z$  = 1364.5128, calcd for C<sub>92</sub>H<sub>76</sub>N<sub>4</sub>O<sub>4</sub>Zn [M]<sup>+</sup>: 1364.5158.

## Synthesis of porphyrin H<sub>2</sub>L

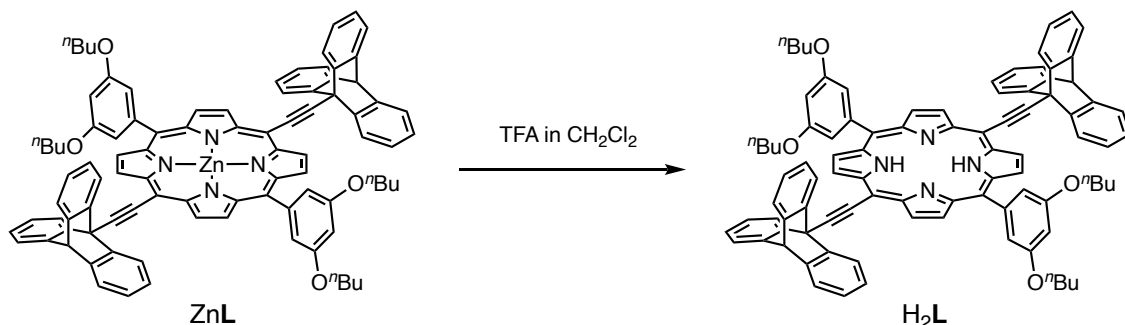

The zinc porphyrin ZnL (1.01 g, 742  $\mu$ mol) was dissolved in a mixture of CH<sub>2</sub>Cl<sub>2</sub> (60 mL) and TFA (15 mL). The resulting solution was stirred at room temperature for 1 hr. The reaction mixture was diluted with CH<sub>2</sub>Cl<sub>2</sub> (100 mL) and the organic phase was washed with H<sub>2</sub>O (100 mL  $\times$  2), saturated aqueous NaHCO<sub>3</sub> (50 mL  $\times$  2) and brine (50 mL), dried over anhydrous Na<sub>2</sub>SO<sub>4</sub>, filtered and evaporated. The crude compound was purified by reprecipitation of a CH<sub>2</sub>Cl<sub>2</sub> solution with MeOH to give H<sub>2</sub>L as a purple solid (917 mg, 96%).

<sup>1</sup>H NMR (400 MHz, CDCl<sub>3</sub>/TMS):  $\delta$  = 9.99 (d,  $J$  = 4.8 Hz, 4H), 9.11 (d,  $J$  = 4.8 Hz, 4H), 8.39 (d,  $J$  = 7.2 Hz, 6H), 7.56 (d,  $J$  = 6.6 Hz, 6H), 7.42 (d,  $J$  = 2.0 Hz, 4H), 7.26–7.15 (m, 23H, including CHCl<sub>3</sub>), 6.91 (t,  $J$  = 2.4 Hz, 2H), 5.63 (s, 2H), 4.17 (t,  $J$  = 6.8 Hz, 8H), 1.88 (tt,  $J$  = 7.2, 7.2 Hz, 8H), 1.61–1.51 (m, 48H, including H<sub>2</sub>O), 1.00 (t,  $J$  = 7.4 Hz, 12H), -1.99 (s, 2H).

<sup>13</sup>C NMR (100 MHz, CDCl<sub>3</sub>/TMS):  $\delta$  = 158.5, 145.0, 144.7, 143.0, 126.0, 125.6, 123.8, 122.9, 122.0, 114.3, 101.2, 100.5, 94.4, 91.9, 68.1, 54.9, 53.5, 31.4, 19.3, 13.9.

HR-MS (MALDI, DCTB):  $m/z$  = 1302.6034, calcd for C<sub>92</sub>H<sub>78</sub>N<sub>4</sub>O<sub>4</sub> [M]<sup>+</sup>: 1302.6023.

## Synthesis of double-decker complex Ce(L)<sub>2</sub>

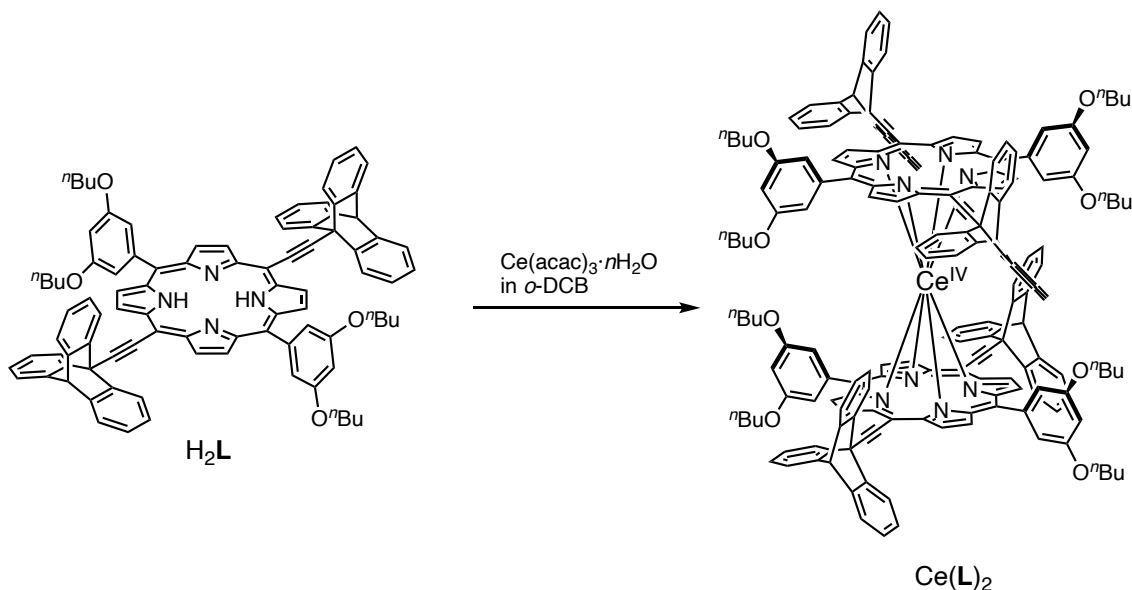

The porphyrin H<sub>2</sub>L (133 mg, 1.0 mmol) and Ce(acac)<sub>3</sub>·nH<sub>2</sub>O (98 mg, 199 μmol), and *o*-DCB (10 mL) were added to the pressure tube. The resulting mixture was heated under microwave irradiation at 250 °C for 1 hr. Once back to room temperature, Ce(acac)<sub>3</sub>·nH<sub>2</sub>O (201 mg, 410 μmol) was added to the reaction mixture. The resulting mixture was further heated under microwave irradiation at 250 °C for 2.5 hrs. The reaction mixture was then purified by silica gel column chromatography (4ϕ × 14 cm, hexane : CH<sub>2</sub>Cl<sub>2</sub> = 6 : 4). The main fraction was further purified by recycling GPC (JAIGEL 2H-2.5H, eluent : CHCl<sub>3</sub>) to afford Ce(L)<sub>2</sub> as a blackish brown solid (80 mg, 58%).

<sup>1</sup>H NMR (600 MHz, CDCl<sub>3</sub>/TMS): δ = 9.85 (d, *J* = 4.2 Hz, 4H), 9.56 (d, *J* = 4.2 Hz, 4H), 9.10 (br, 4H), 8.90 (d, *J* = 4.2 Hz, 4H), 8.58 (d, *J* = 7.8 Hz, 12H), 8.50 (d, *J* = 4.2 Hz, 4H), 7.58 (d, *J* = 7.8 Hz, 12H), 7.08 (t, *J* = 6.9 Hz, 12H), 6.92–6.90 (m, 16H), 5.80 (t, *J* = 1.5 Hz, 4H), 5.67 (s, 4H), 4.76–4.72 (m, 4H), 4.65–4.61 (m, 4H), 3.77–3.70 (m, 8H), 1.91–1.79 (m, 8H), 1.56–1.48 (m, 18H, including H<sub>2</sub>O), 1.46–1.38 (m, 4H), 1.25 (tq, *J* = 7.4, 7.4 Hz, 8H), 0.97 (t, *J* = 7.5 Hz, 12H), 0.75 (t, *J* = 7.5 Hz, 12H).

<sup>13</sup>C NMR (150 MHz, CDCl<sub>3</sub>/TMS): δ = 158.9, 158.1, 155.2, 155.0, 152.9, 152.3, 145.5, 144.7, 143.0, 130.6, 129.0, 128.9, 127.3, 125.9, 125.8, 125.6, 123.6, 123.1, 115.6, 114.9, 103.6, 101.5, 93.7, 91.5, 69.0, 67.6, 54.6, 53.7, 31.6, 31.1, 19.4, 19.0, 14.1, 13.7.

HR-MS (MALDI, DCTB): *m/z* = 2741.0850, calcd for C<sub>184</sub>H<sub>152</sub>N<sub>8</sub>O<sub>8</sub>Ce [M]<sup>+</sup>: 2741.0787. Elemental Anal. calcd for C<sub>184</sub>H<sub>152</sub>N<sub>8</sub>O<sub>8</sub>Ce : C; 80.56, H; 5.58, N; 4.08, found: C; 80.42, H; 5.51, N; 4.16 (0.14% error).



### Synthesis of porphyrin Zn3

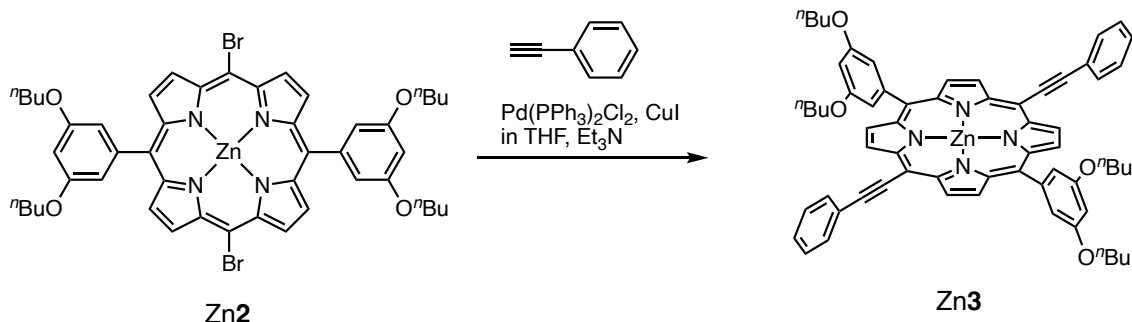

Zinc porphyrin **Zn2** (293 mg, 302  $\mu\text{mol}$ ), phenylacetylene (132  $\mu\text{L}$ , 1.2 mmol),  $\text{Pd}(\text{PPh}_3)_2\text{Cl}_2$  (22 mg, 32  $\mu\text{mol}$ ) and  $\text{CuI}$  (6 mg, 33  $\mu\text{mol}$ ) were suspended in a mixture of THF and  $\text{Et}_3\text{N}$  (4 : 1 (v/v), 15 mL). The resulting mixture was degassed by four successive freeze-pump-thaw cycles and then refluxed for 3 hrs. The reaction mixture was filtered through Celite and the filtrate was evaporated. The crude compound was purified by silica gel column chromatography (4 $\phi$   $\times$  13 cm, hexane :  $\text{CH}_2\text{Cl}_2$  = 4 : 6) to afford a crude green solid, which was further purified by reprecipitation of a  $\text{CH}_2\text{Cl}_2$  solution with MeOH to afford **Zn3** as a green solid (253 mg, 83%).

$^1\text{H}$  NMR (400 MHz,  $\text{CDCl}_3/\text{TMS}$ ):  $\delta$  = 9.76 (d,  $J$  = 5.2 Hz, 4H), 9.06 (d,  $J$  = 4.4 Hz, 4H), 8.04–8.02 (m, 4H), 7.59–7.56 (m, 4H), 7.52–7.48 (m, 2H), 7.37 (d,  $J$  = 2.4 Hz, 4H), 6.91 (d,  $J$  = 2.4 Hz, 2H), 4.16 (t,  $J$  = 6.6 Hz, 8H), 1.88 (tt,  $J$  = 7.1, 7.1 Hz, 8H), 1.60–1.51 (m, 26H, including  $\text{H}_2\text{O}$ ), 1.01 (t,  $J$  = 7.2 Hz, 12H).

$^{13}\text{C}$  NMR (100 MHz,  $\text{CDCl}_3/\text{TMS}$ ):  $\delta$  = 158.3, 152.0, 149.8, 143.8, 132.8, 131.5, 130.9, 128.6, 128.5, 123.9, 122.7, 114.2, 101.6, 101.1, 96.5, 92.2, 68.1, 31.4, 19.3, 13.9.

HR-MS (MALDI, DCTB):  $m/z$  = 1012.3889, calcd for  $\text{C}_{64}\text{H}_{60}\text{N}_4\text{O}_4\text{Zn}$  [ $\text{M}$ ] $^+$ : 1012.3906.

### Synthesis of porphyrin H<sub>2</sub>3

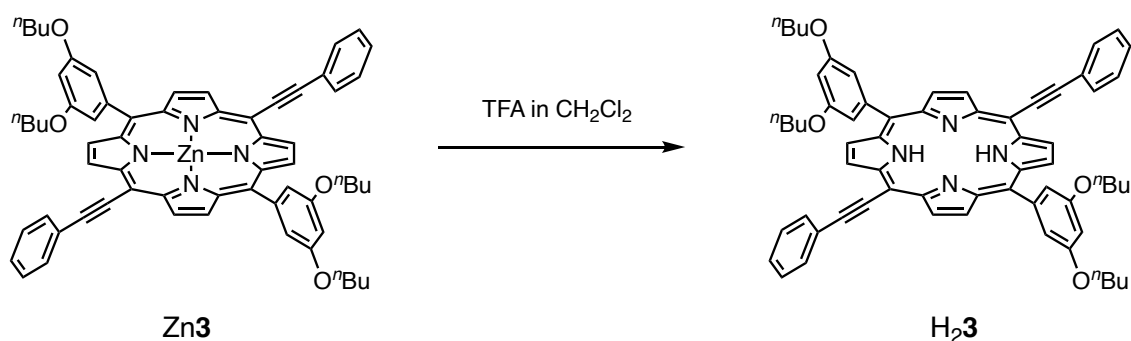

The zinc porphyrin **Zn3** (508 mg, 500  $\mu$ mol) was dissolved in the mixture of CH<sub>2</sub>Cl<sub>2</sub> (40 mL) and TFA (10 mL). The resulting solution was stirred at room temperature for 1 hr. The reaction mixture was diluted with CH<sub>2</sub>Cl<sub>2</sub> (150 mL) and the organic phase was washed with H<sub>2</sub>O (100 mL  $\times$  3), saturated aqueous Na<sub>2</sub>CO<sub>3</sub> (100 mL) and brine (50 mL), dried over anhydrous Na<sub>2</sub>SO<sub>4</sub>, filtered and evaporated to give **H<sub>2</sub>3** as a purple solid (475 mg, quant.).

<sup>1</sup>H NMR (400 MHz, CDCl<sub>3</sub>/TMS):  $\delta$  = 9.72 (d,  $J$  = 4.4 Hz, 4H), 8.96 (d,  $J$  = 4.4 Hz, 4H), 8.05–8.02 (m, 4H), 7.61–7.57 (m, 4H), 7.54–7.50 (m, 2H), 7.36 (d,  $J$  = 2.4 Hz, 4H), 6.91 (t,  $J$  = 2.4 Hz, 2H), 4.16 (t,  $J$  = 6.4 Hz, 8H), 1.88 (tt,  $J$  = 7.0 Hz, 8H), 1.61–1.51 (m, 16H, including H<sub>2</sub>O), 1.01 (t,  $J$  = 7.4 Hz, 12H), -2.01 (s, 2H).

<sup>13</sup>C NMR (100 MHz, CDCl<sub>3</sub>/TMS):  $\delta$  = 158.5, 143.0, 131.7, 128.7, 123.8, 121.8, 114.3, 101.2, 101.0, 97.2, 91.9, 68.1, 31.4, 19.3, 13.9.

HR-MS (MALDI, DCTB):  $m/z$  = 950.4774, calcd for C<sub>64</sub>H<sub>62</sub>N<sub>4</sub>O<sub>4</sub> [M]<sup>+</sup>: 950.4771.

## Synthesis of double-decker complex Ce(3)<sub>2</sub>

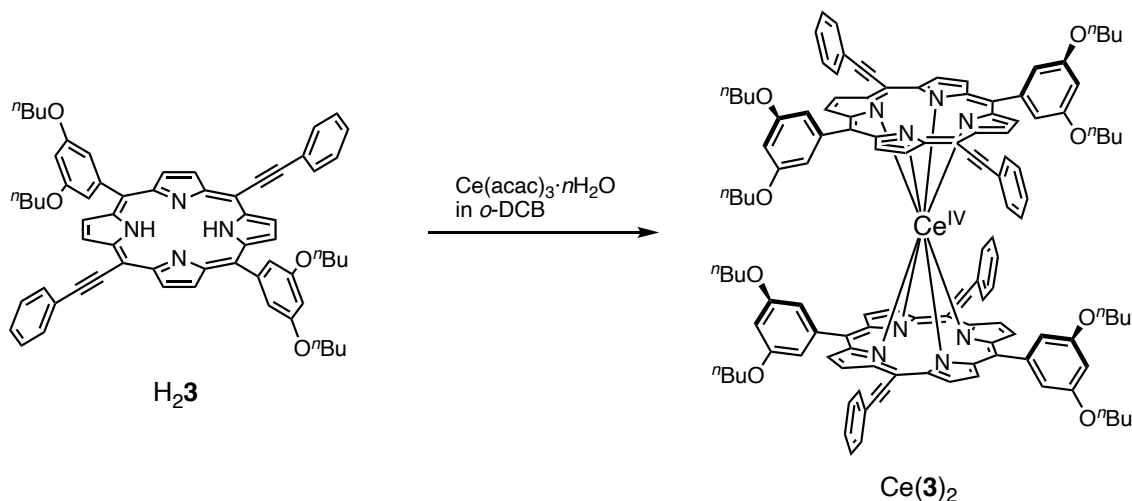

The porphyrin **H<sub>2</sub>3** (95 mg, 99  $\mu\text{mol}$ ),  $\text{Ce}(\text{acac})_3 \cdot n\text{H}_2\text{O}$  (131 mg, 298  $\mu\text{mol}$ ) and *o*-DCB (5.0 mL) were added to the pressure tube. The resulting mixture was heated under microwave irradiation at 220 °C for 0.5 hr and then 240 °C for 0.5 hr with two cycles. The reaction mixture was purified by silica gel column chromatography (4 $\phi$   $\times$  15 cm, hexane :  $\text{CH}_2\text{Cl}_2$  = 1 : 1 – 4 : 6) to yield **Ce(3)<sub>2</sub>** as a blackish brown solid (31 mg, 31%).

<sup>1</sup>H NMR (400 MHz,  $\text{CDCl}_3/\text{TMS}$ ):  $\delta$  = 9.42 (d,  $J$  = 4.8 Hz, 4H), 9.18 (d,  $J$  = 4.8 Hz, 4H), 8.96 (br, 4H), 8.52 (d,  $J$  = 4.8 Hz, 4H), 8.34 (d,  $J$  = 4.0 Hz, 4H), 8.18 (d,  $J$  = 6.8 Hz, 8H), 7.71 (dd,  $J$  = 7.4, 7.4 Hz, 8H), 7.61–7.57 (m, 4H), 6.90 (dd,  $J$  = 2.2, 2.2 Hz, 4H), 5.64 (dd,  $J$  = 1.6, 1.6 Hz, 4H), 4.85–4.74 (m, 8H), 3.69 (t,  $J$  = 5.6 Hz, 8H), 2.31–2.26 (m, 8H), 1.93–1.87 (m, 8H), 1.55–1.49 (m, 25H, including  $\text{H}_2\text{O}$ ), 1.31–1.21 (m, 33H), 0.75 (t,  $J$  = 7.4 Hz, 12H).

<sup>13</sup>C NMR (100 MHz,  $\text{CDCl}_3/\text{TMS}$ ):  $\delta$  = 158.8, 158.0, 155.4, 151.8, 151.5, 150.3, 142.8, 132.4, 130.4, 128.8, 128.7, 128.2, 127.8, 127.6, 125.1, 123.8, 115.4, 115.0, 104.5, 101.3, 98.0, 90.7, 68.9, 67.6, 32.0, 31.0, 19.8, 19.0, 14.3, 13.7.

HR-MS (MALDI, DCTB):  $m/z$  = 2036.8296, calcd for  $\text{C}_{128}\text{H}_{120}\text{N}_8\text{O}_8\text{Ce}$  [ $\text{M}$ ]<sup>+</sup>: 2036.8283.

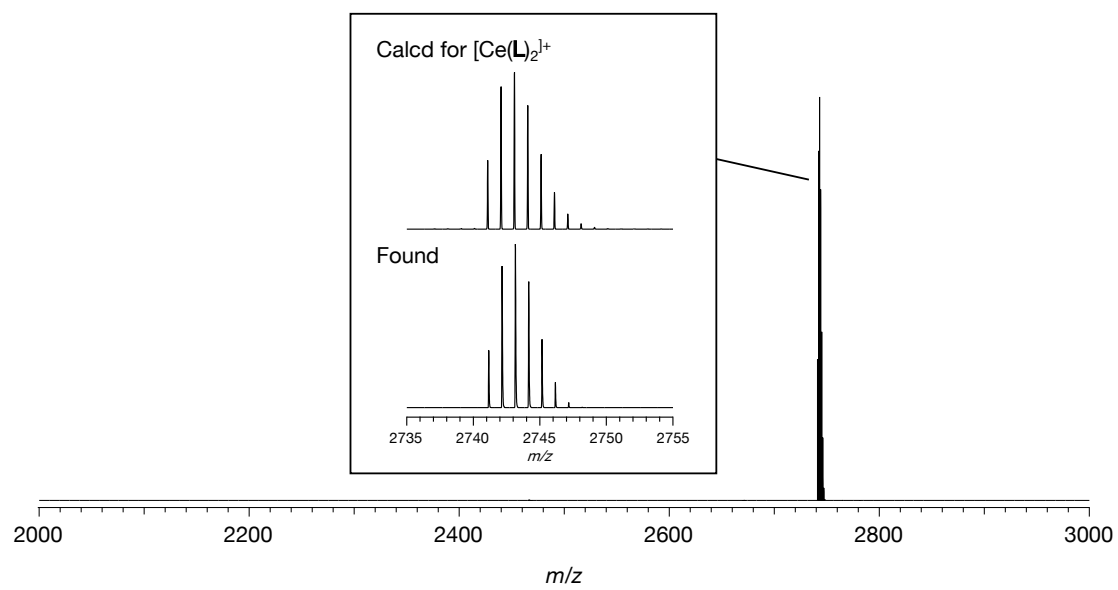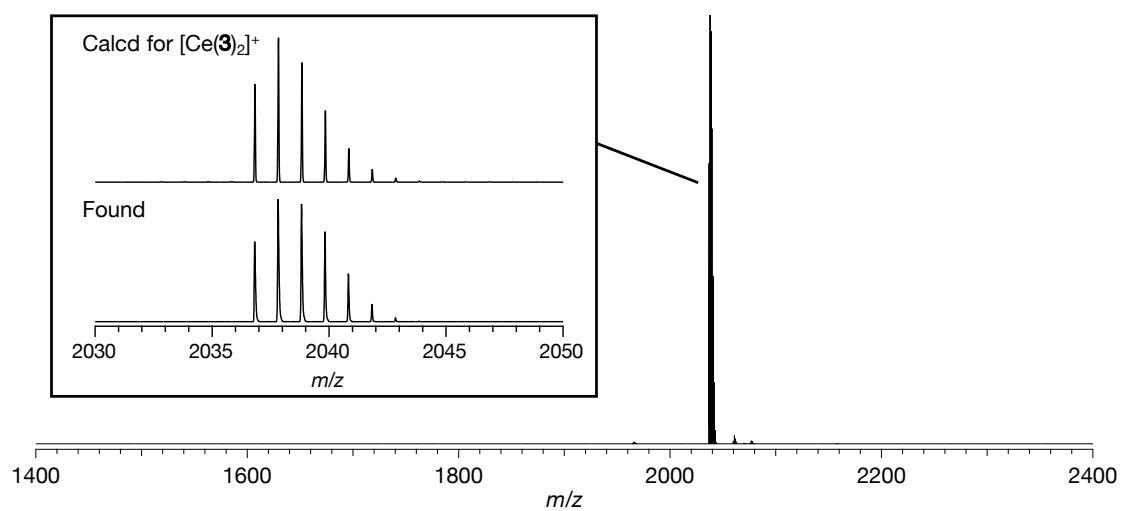

**Figure S1.** MALDI-TOF MS spectrum of  $\text{Ce}(\mathbf{L})_2$  (top) and  $\text{Ce}(\mathbf{3})_2$  (bottom)

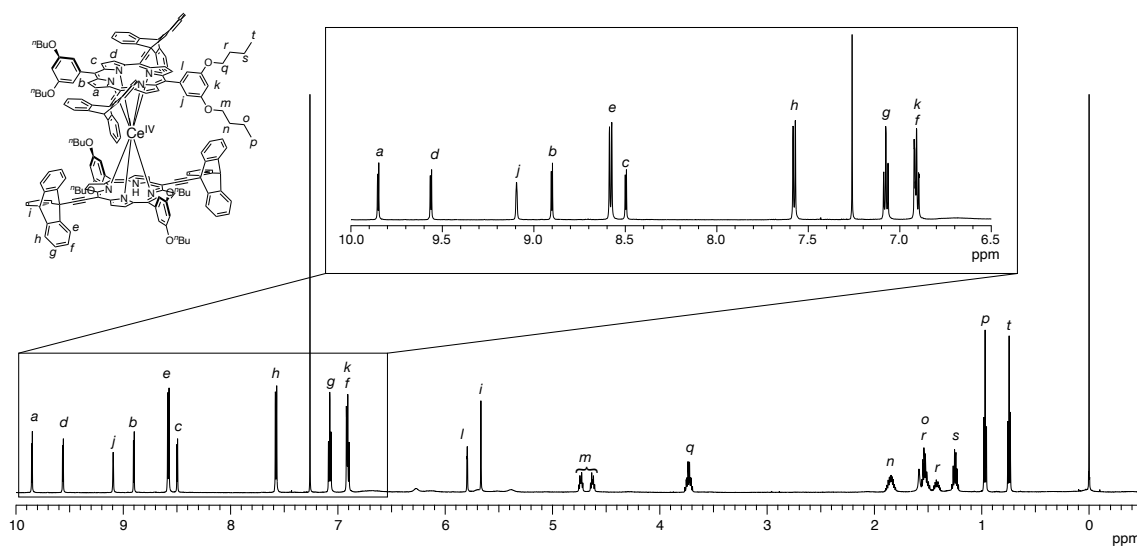

**Figure S2.** <sup>1</sup>H-NMR spectrum of Ce(L)<sub>2</sub> in CDCl<sub>3</sub>.

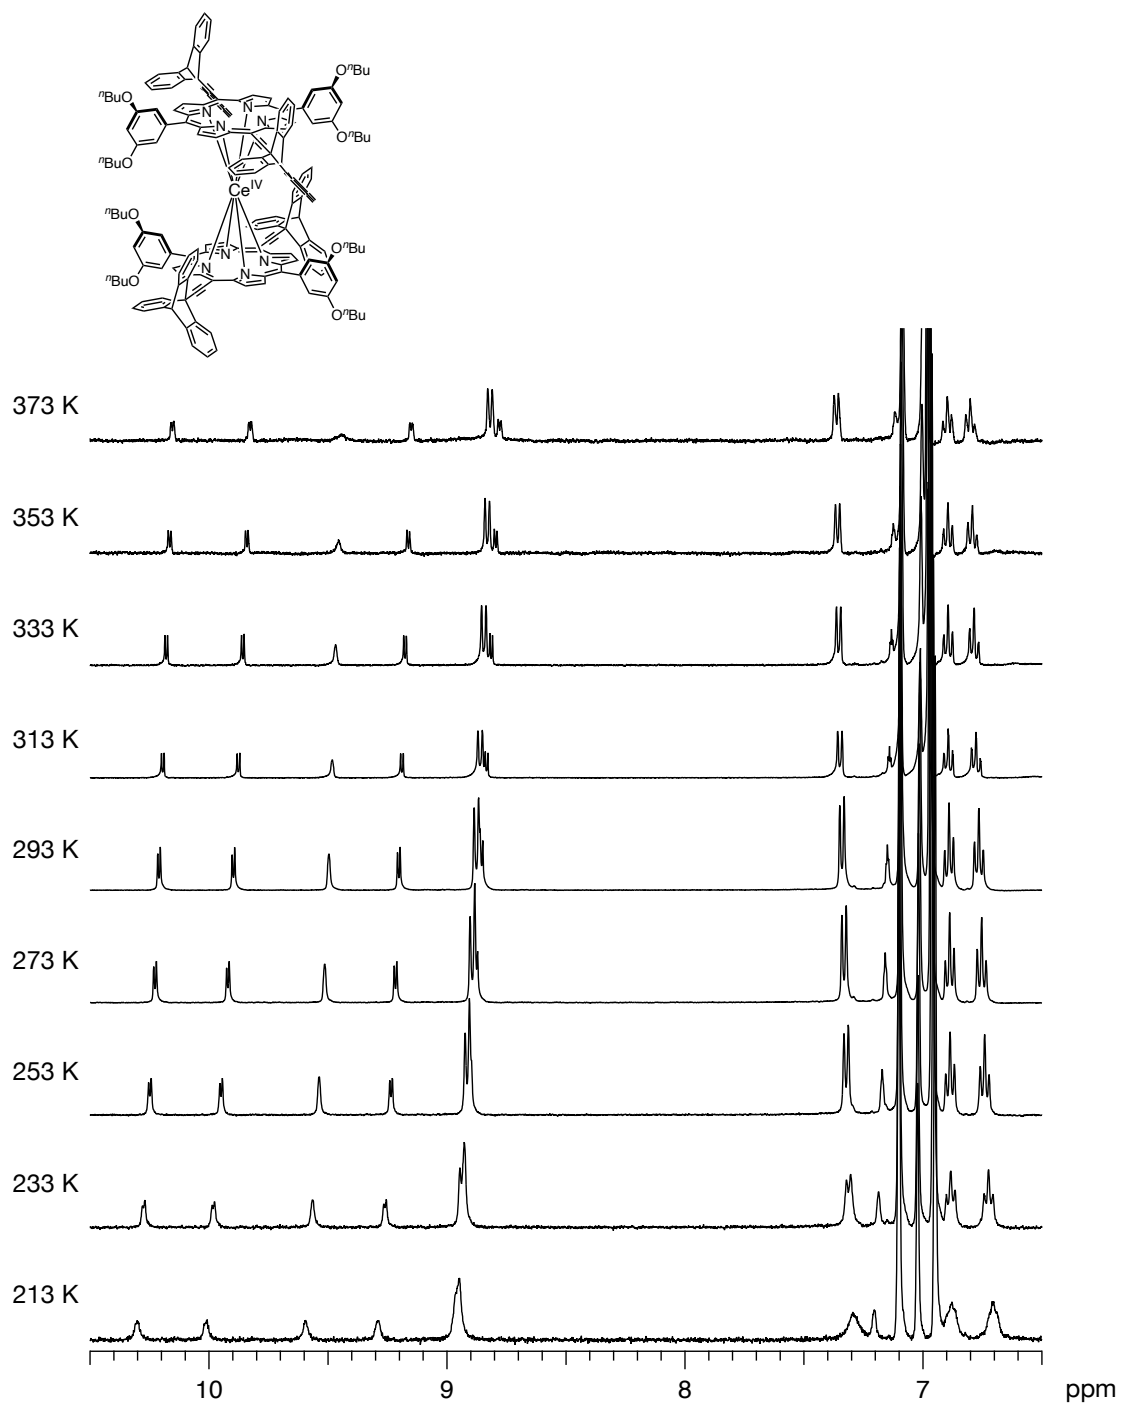

**Figure S3.** Aromatic region of VT  $^1\text{H-NMR}$  spectra of  $\text{Ce}(\text{L})_2$  in  $\text{toluene-}d_8$  (400 MHz).

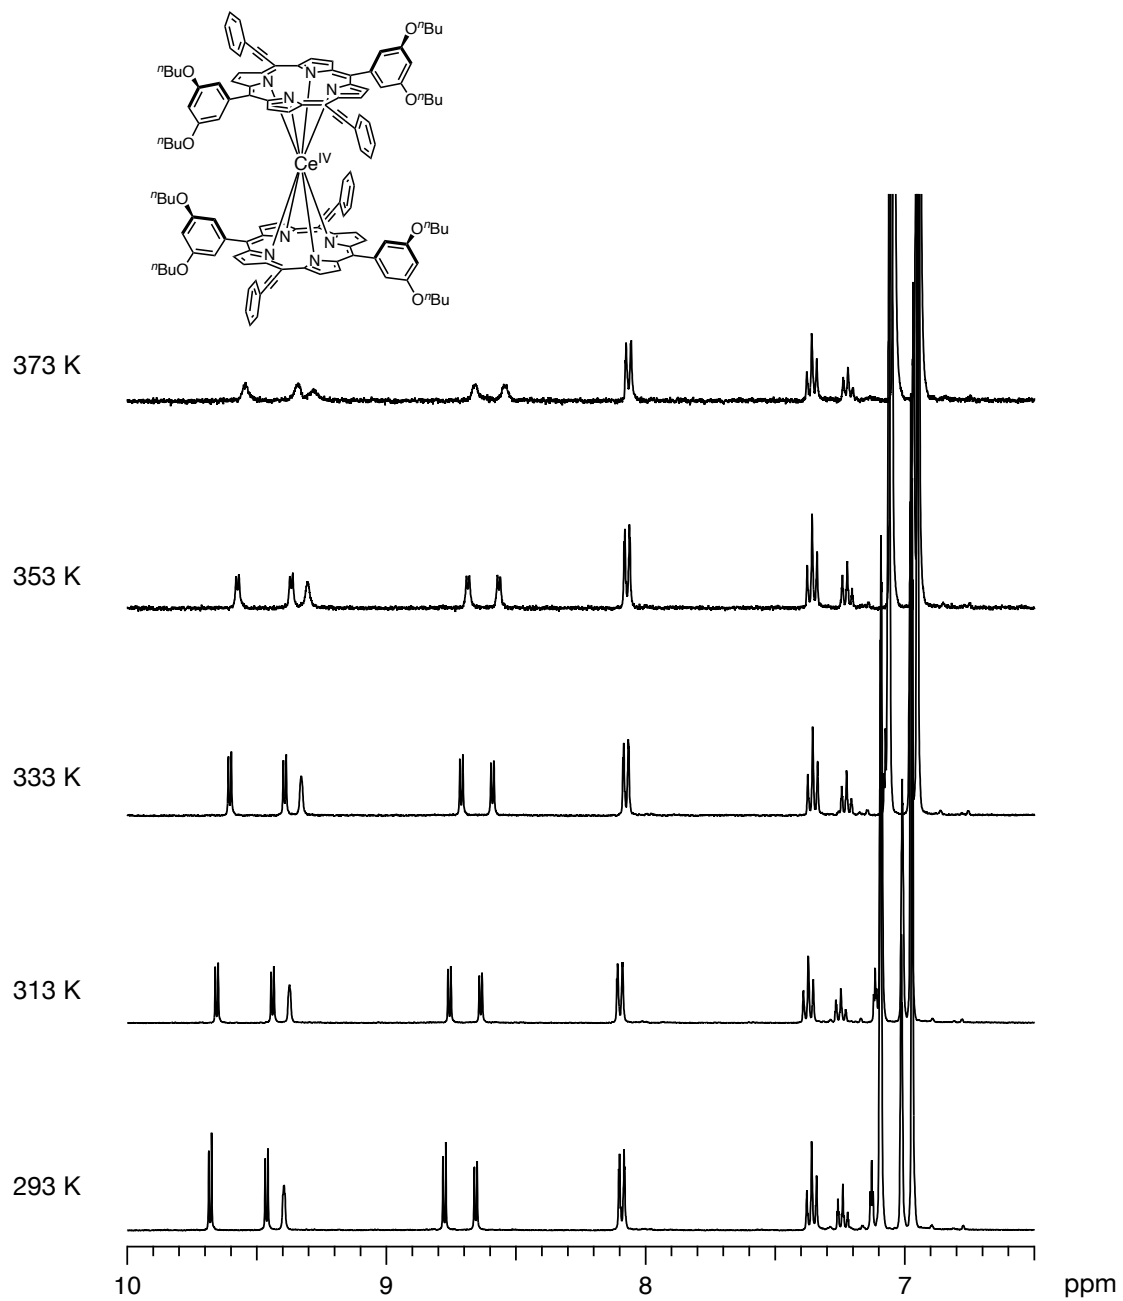

**Figure S4.** Aromatic region of VT  $^1\text{H-NMR}$  spectra of  $\text{Ce}(\mathbf{3})_2$  in  $\text{toluene-}d_8$  (400 MHz).

(a)

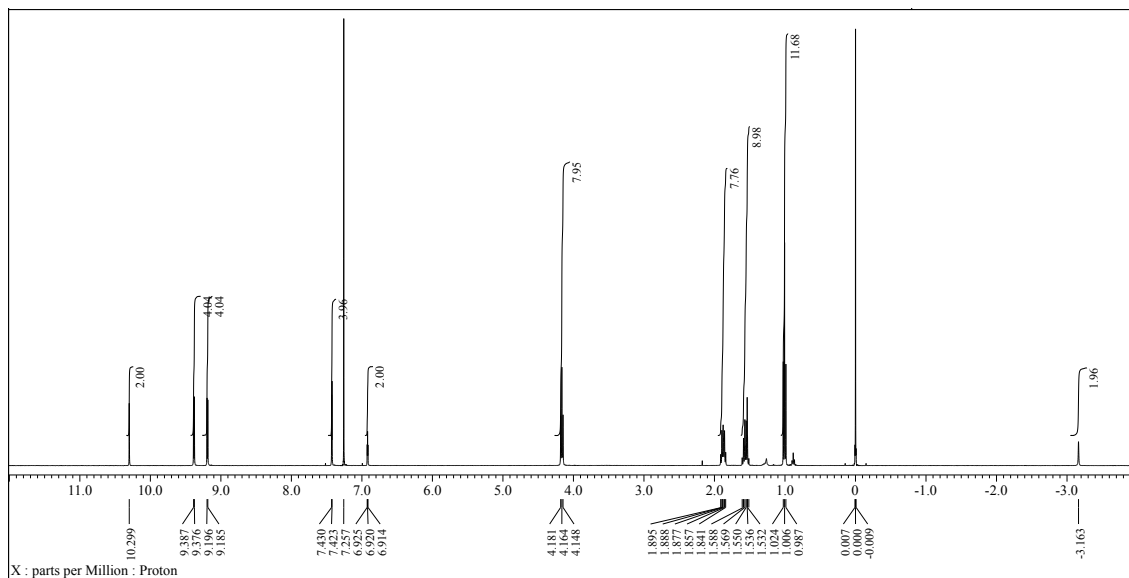

(b)

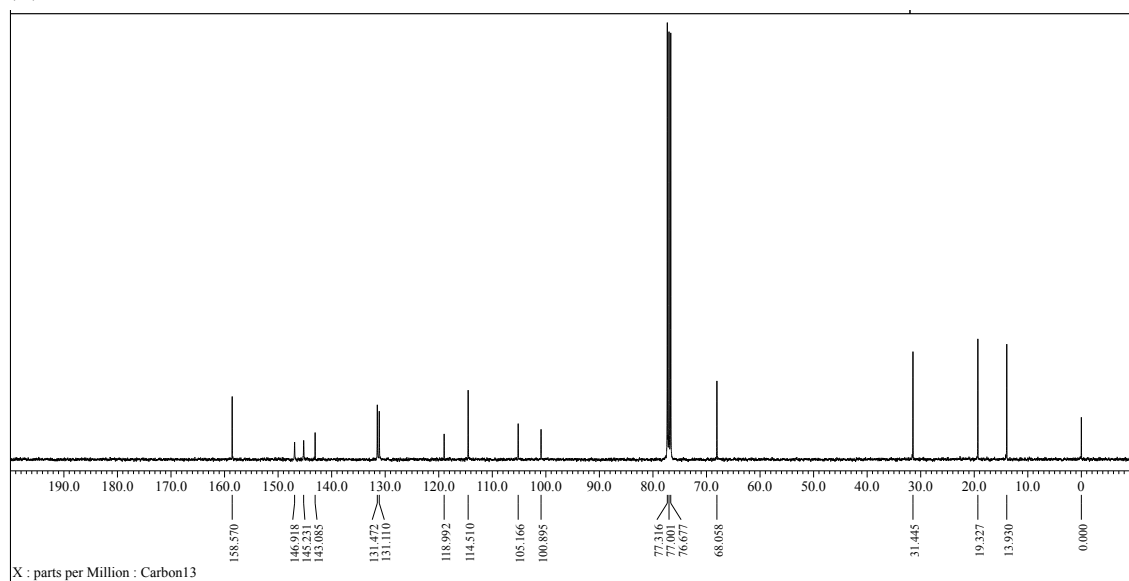

**Figure S5.** (a)  $^1\text{H}$  and (b)  $^{13}\text{C}$  NMR spectra of  $\text{H}_2\mathbf{1}$  in  $\text{CDCl}_3$



(a)

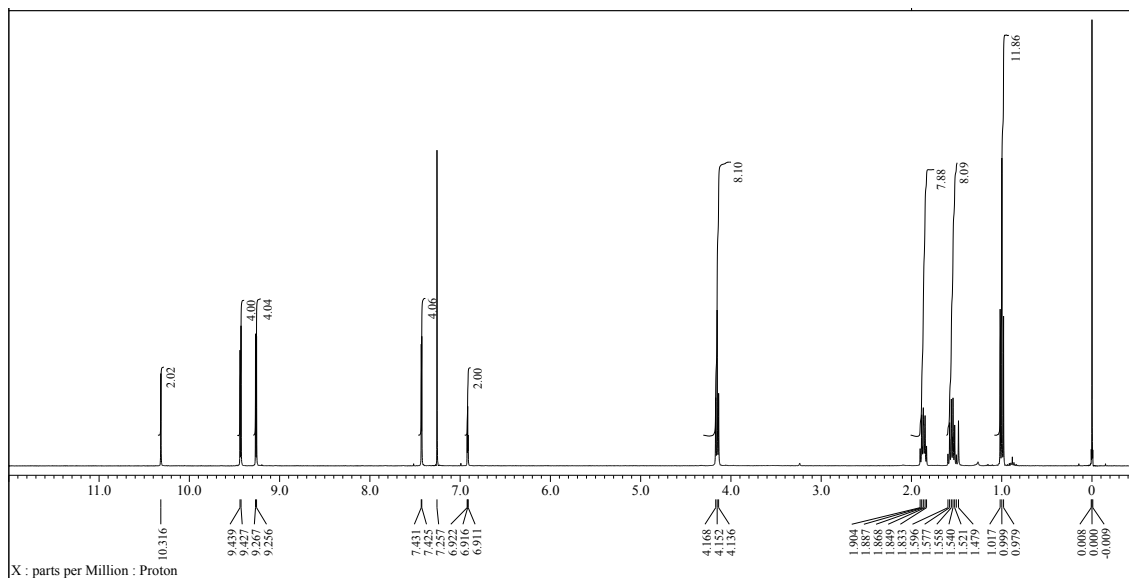

(b)

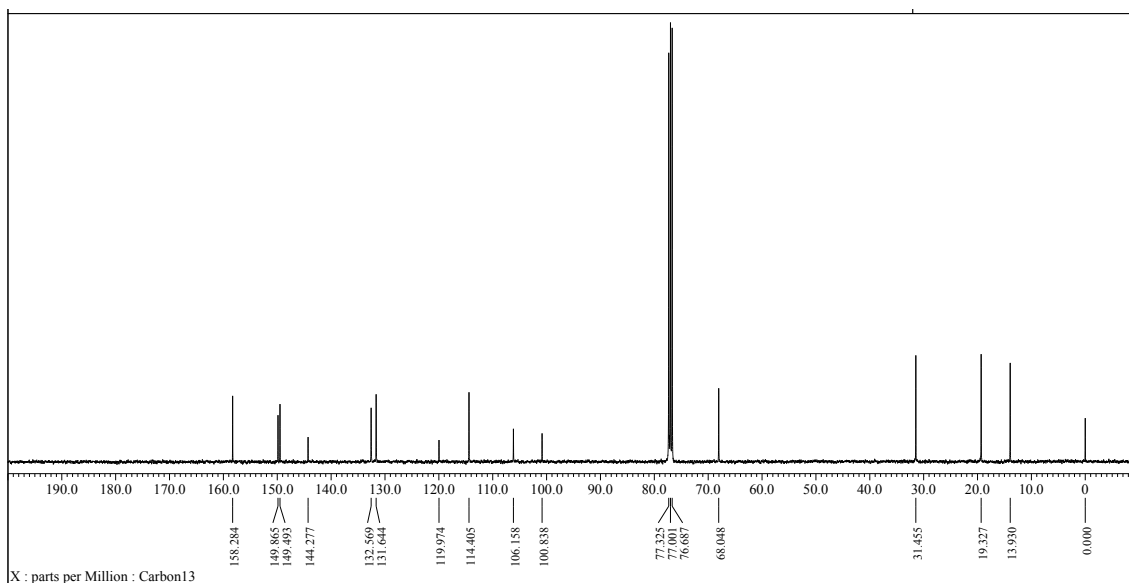

**Figure S6.** (a) <sup>1</sup>H and (b) <sup>13</sup>C NMR spectra of Zn1 in CDCl<sub>3</sub>.

(a)

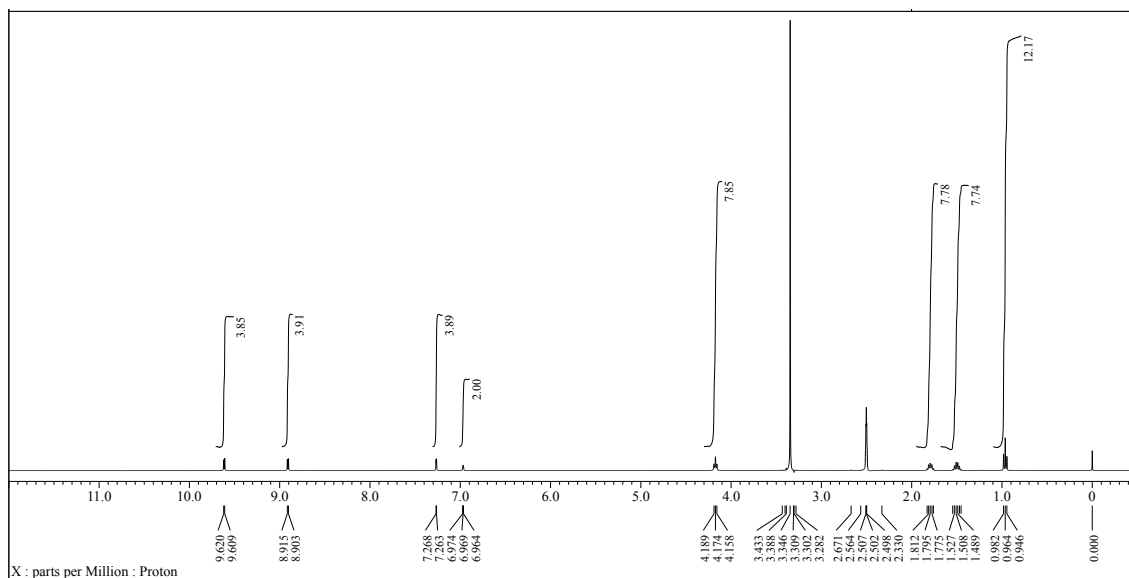

(b)

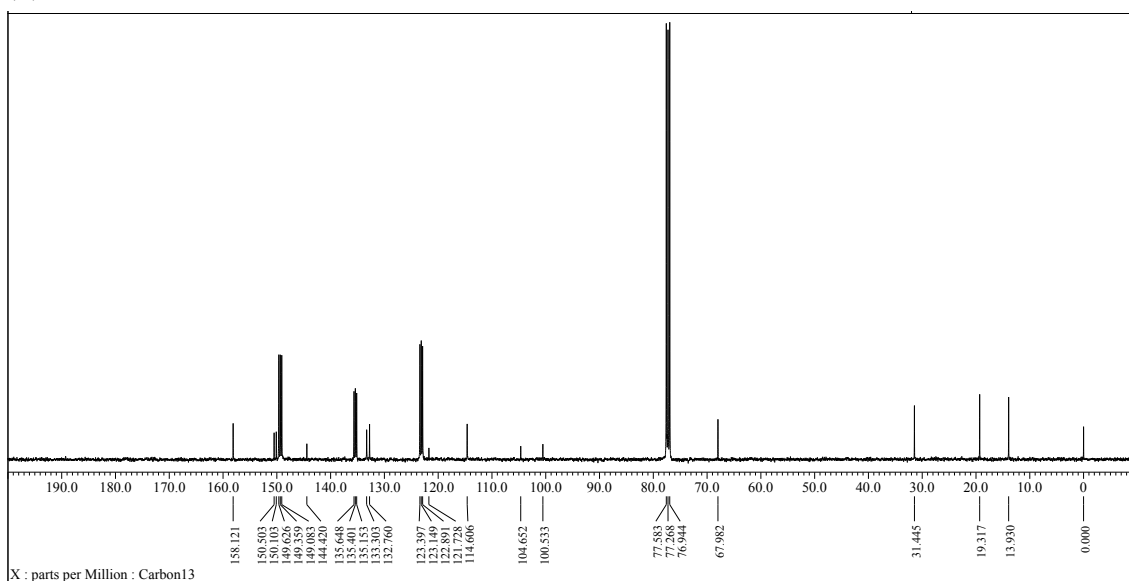

**Figure S7.** (a)  $^1\text{H}$  spectrum in  $\text{DMSO-}d_6$  and (b)  $^{13}\text{C}$  NMR spectrum in  $\text{CDCl}_3$  : pyridine- $d_5$  (9:1 (v/v)) of  $\text{Zn2}$ .

(a)

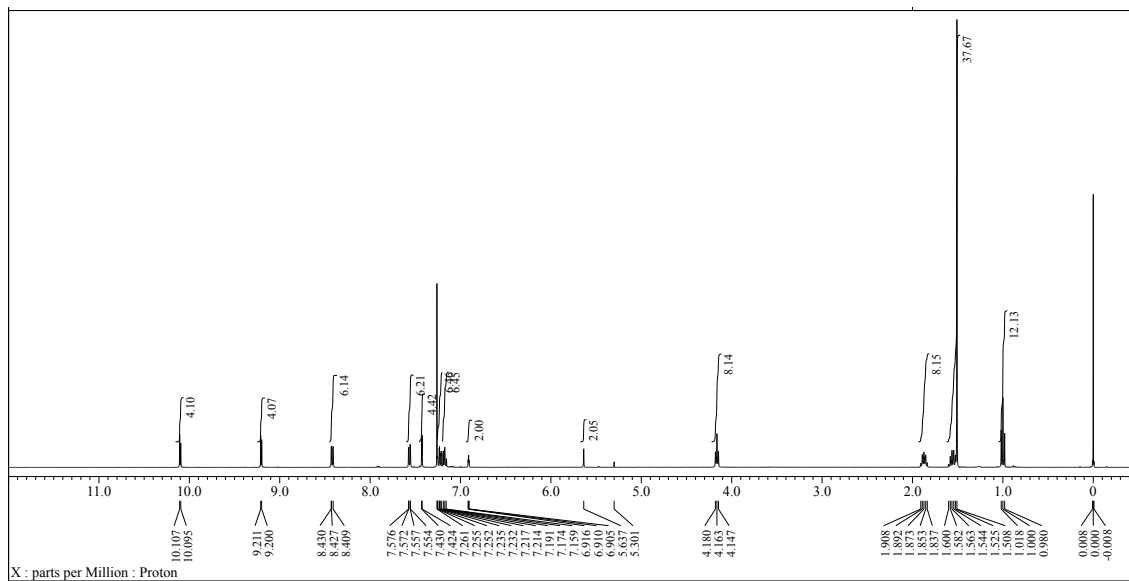

(b)

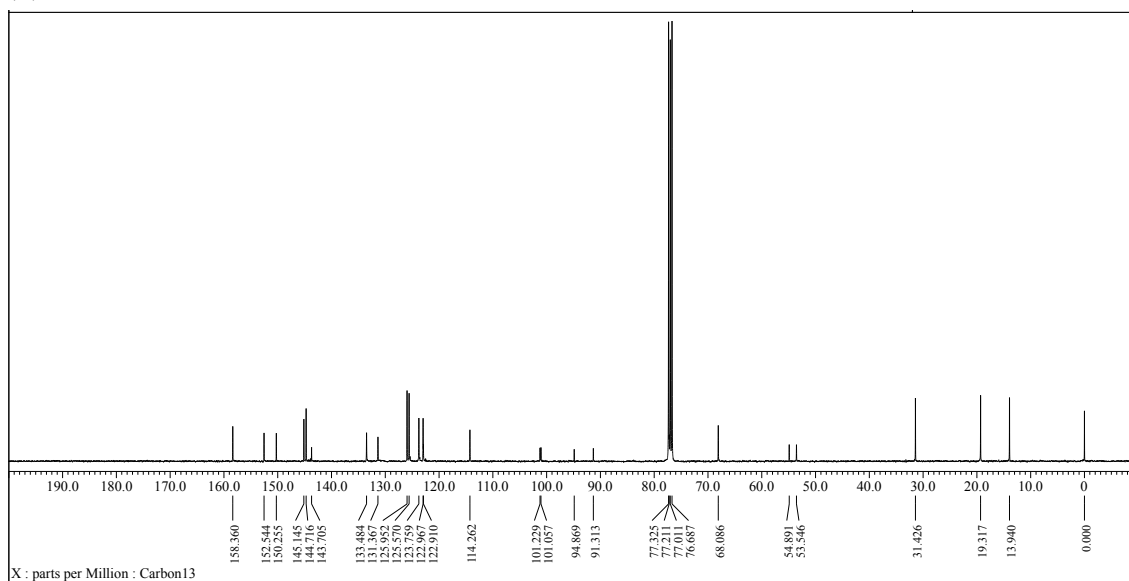

**Figure S8.** (a) <sup>1</sup>H and (b) <sup>13</sup>C NMR spectra of ZnL in CDCl<sub>3</sub>.

(a)

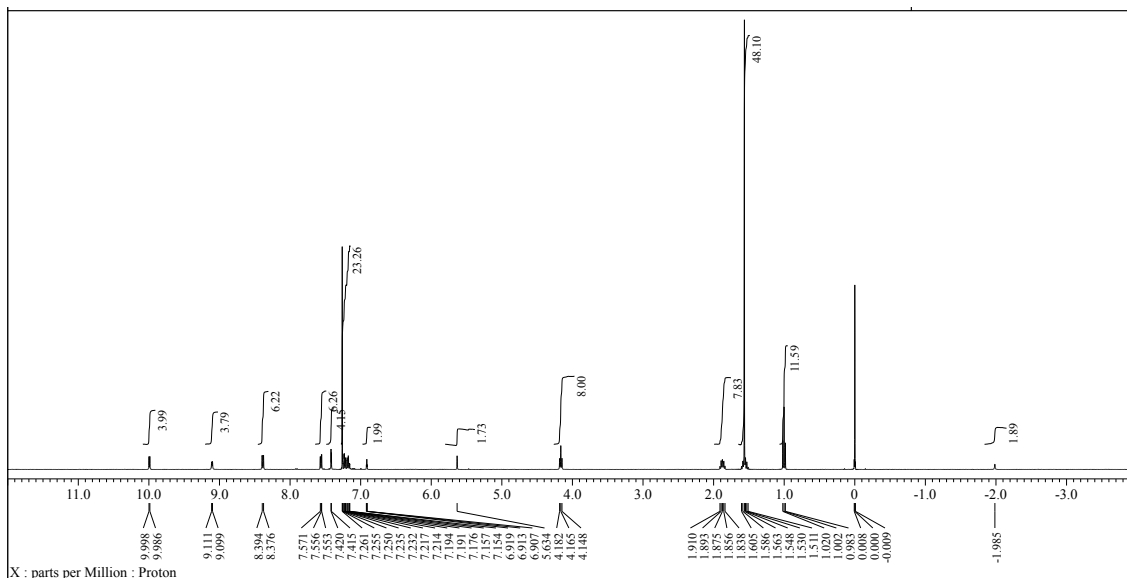

(b)

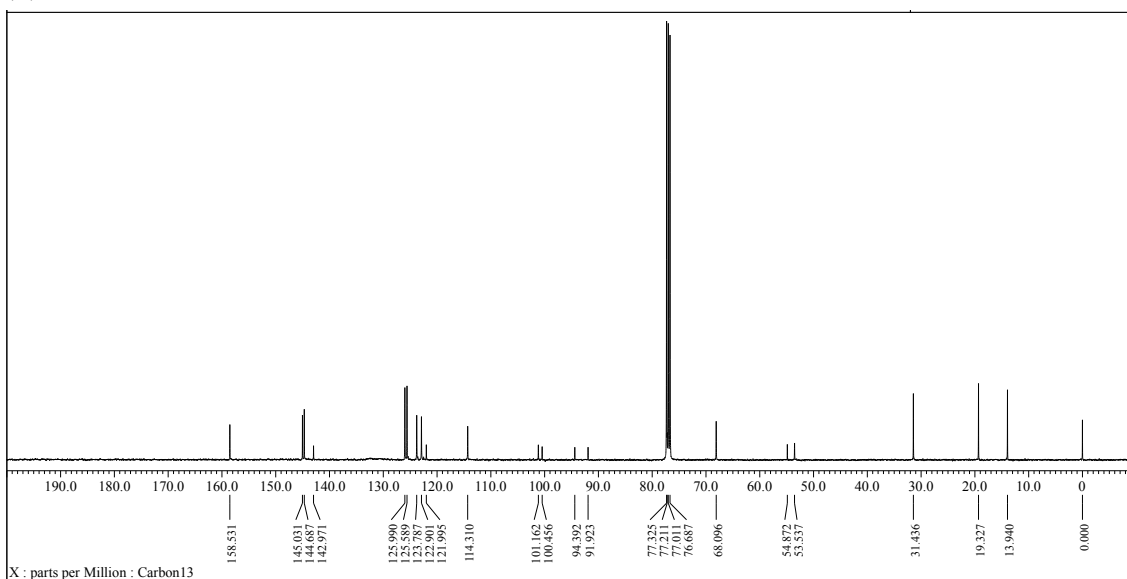

**Figure S9.** (a)  $^1\text{H}$  and (b)  $^{13}\text{C}$  NMR spectra of  $\text{H}_2\text{L}$  in  $\text{CDCl}_3$ .

(a)

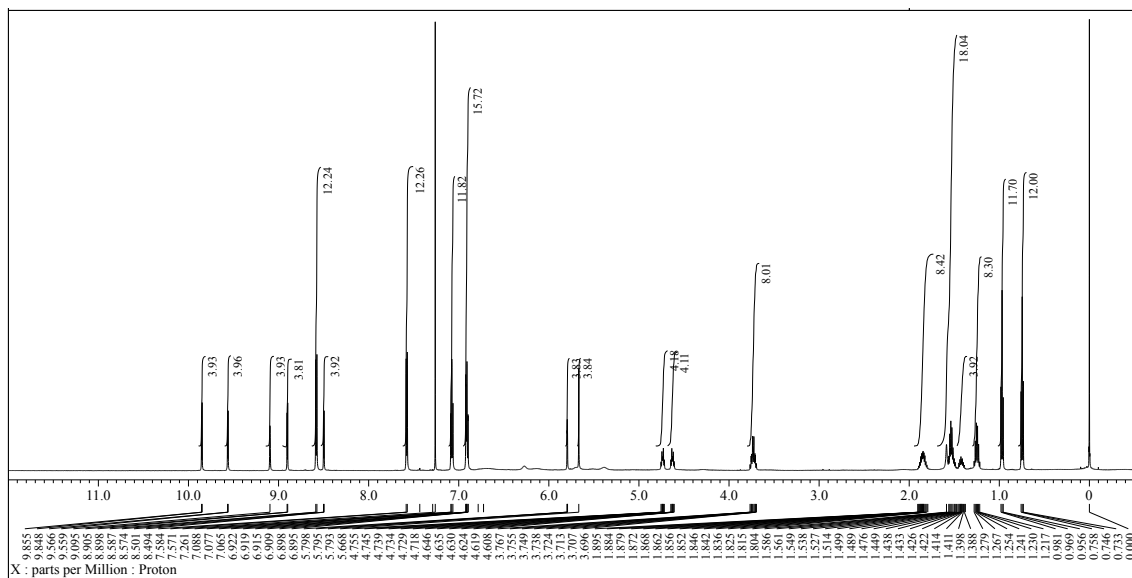

(b)

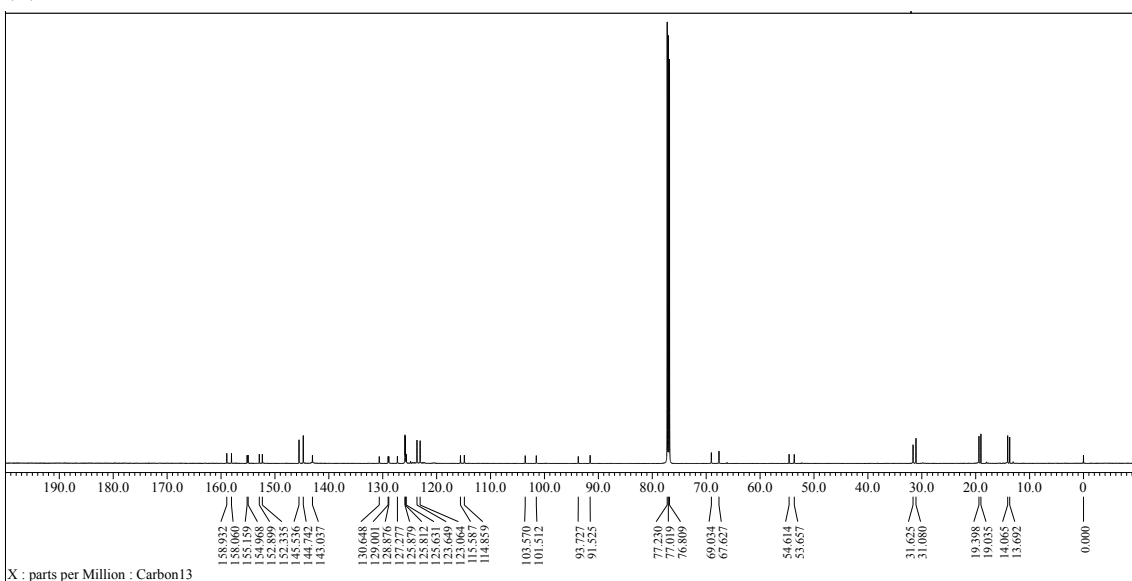

**Figure S10.** (a)  $^1\text{H}$  and (b)  $^{13}\text{C}$  NMR spectra of  $\text{Ce}(\text{L})_2$  in  $\text{CDCl}_3$ .

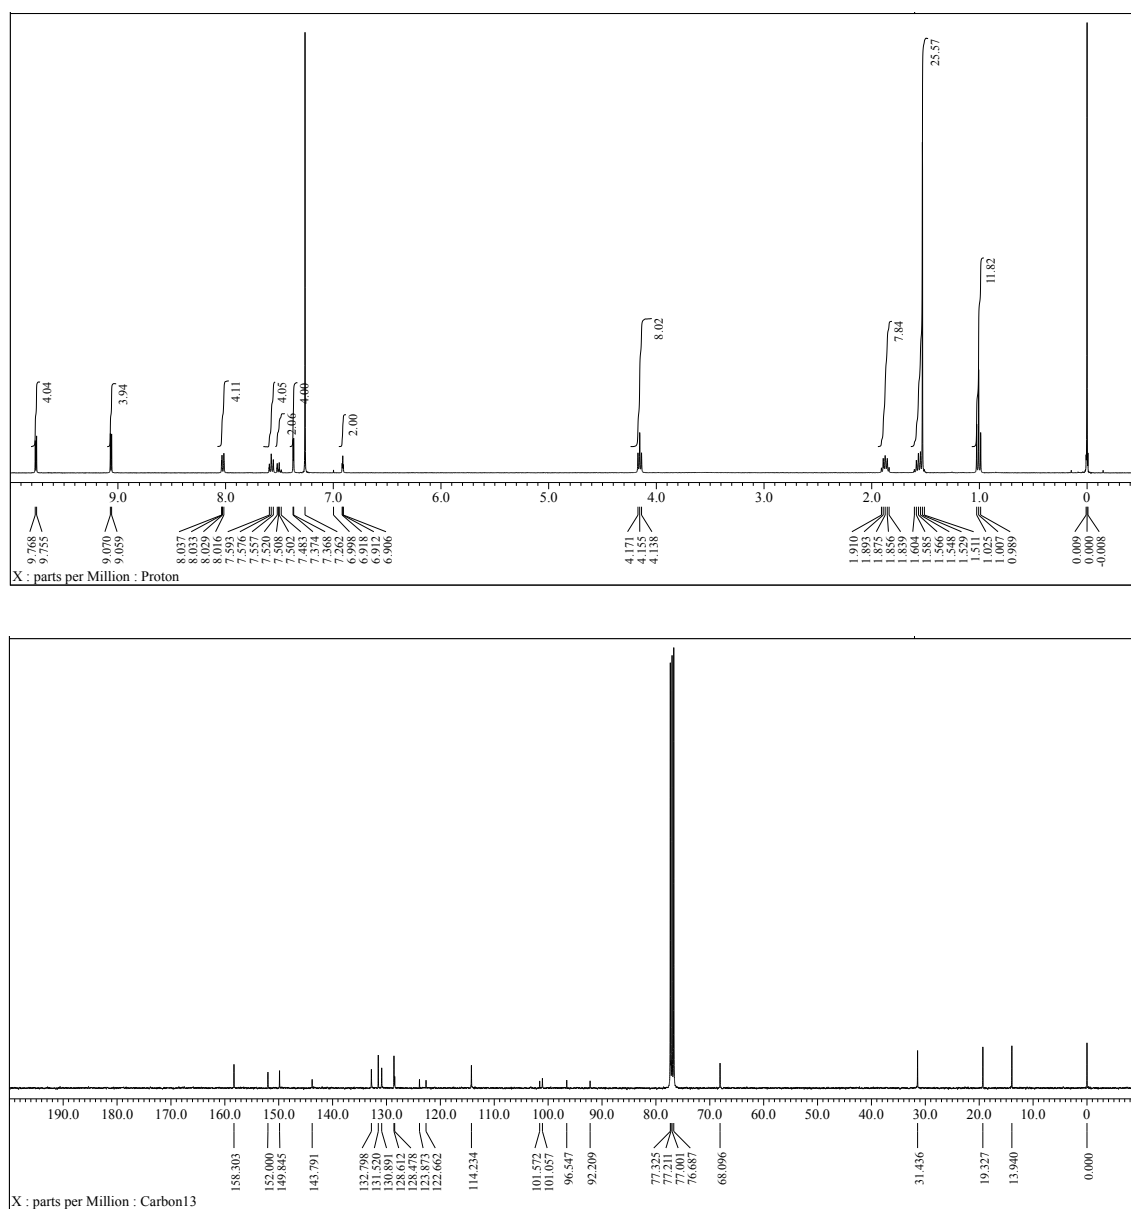

**Figure S11.** (a)  $^1\text{H}$  and (b)  $^{13}\text{C}$  NMR spectra of Zn3 in  $\text{CDCl}_3$ .

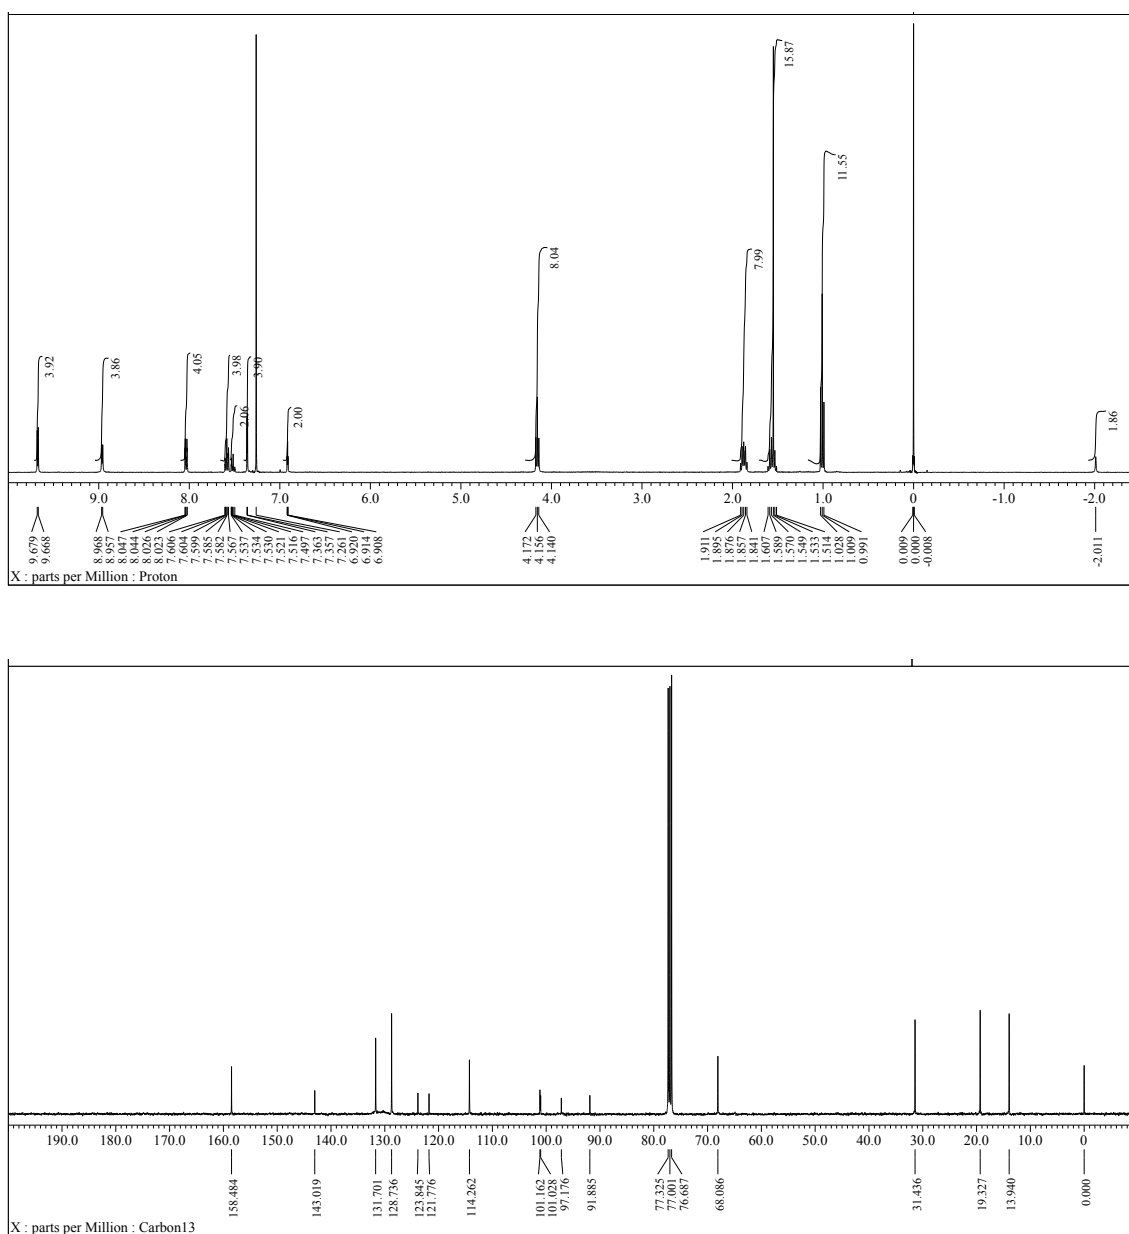

**Figure S12.** (a)  $^1\text{H}$  and (b)  $^{13}\text{C}$  NMR spectra of  $\text{H}_2\mathbf{3}$  in  $\text{CDCl}_3$ .

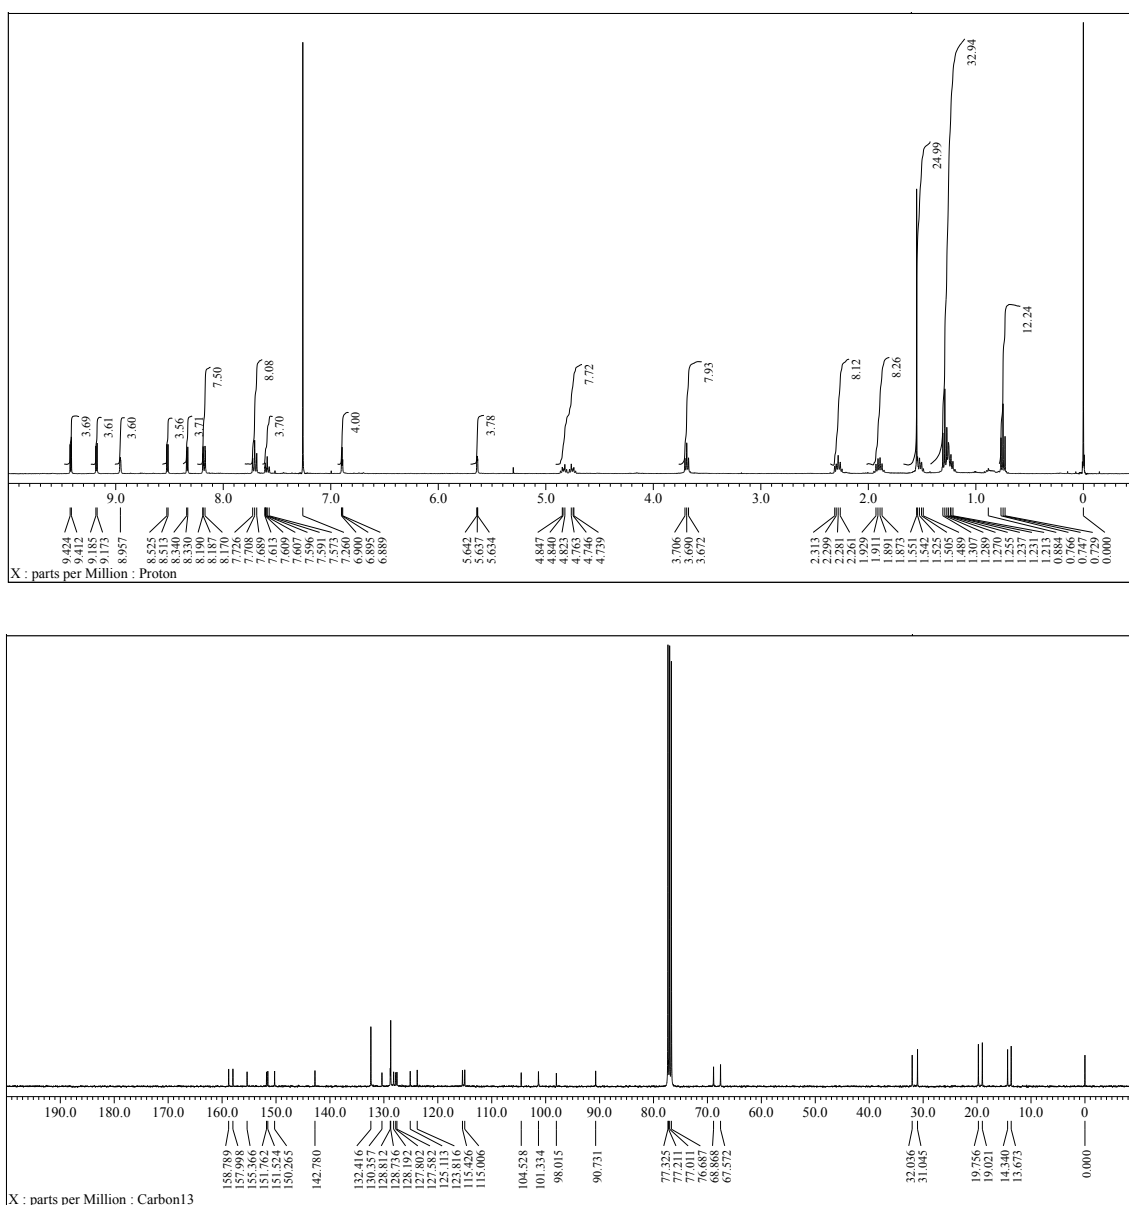

**Figure S13.** (a)  $^1\text{H}$  and (b)  $^{13}\text{C}$  NMR spectra of  $\text{Ce}(\mathbf{3})_2$  in  $\text{CDCl}_3$ .



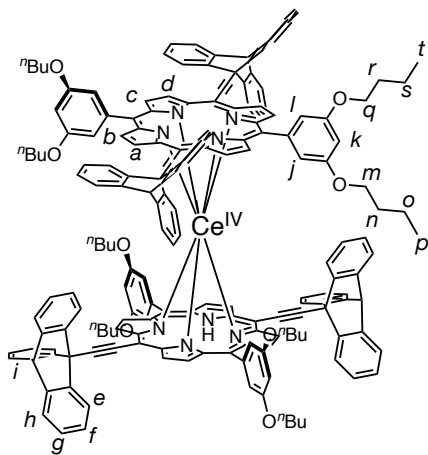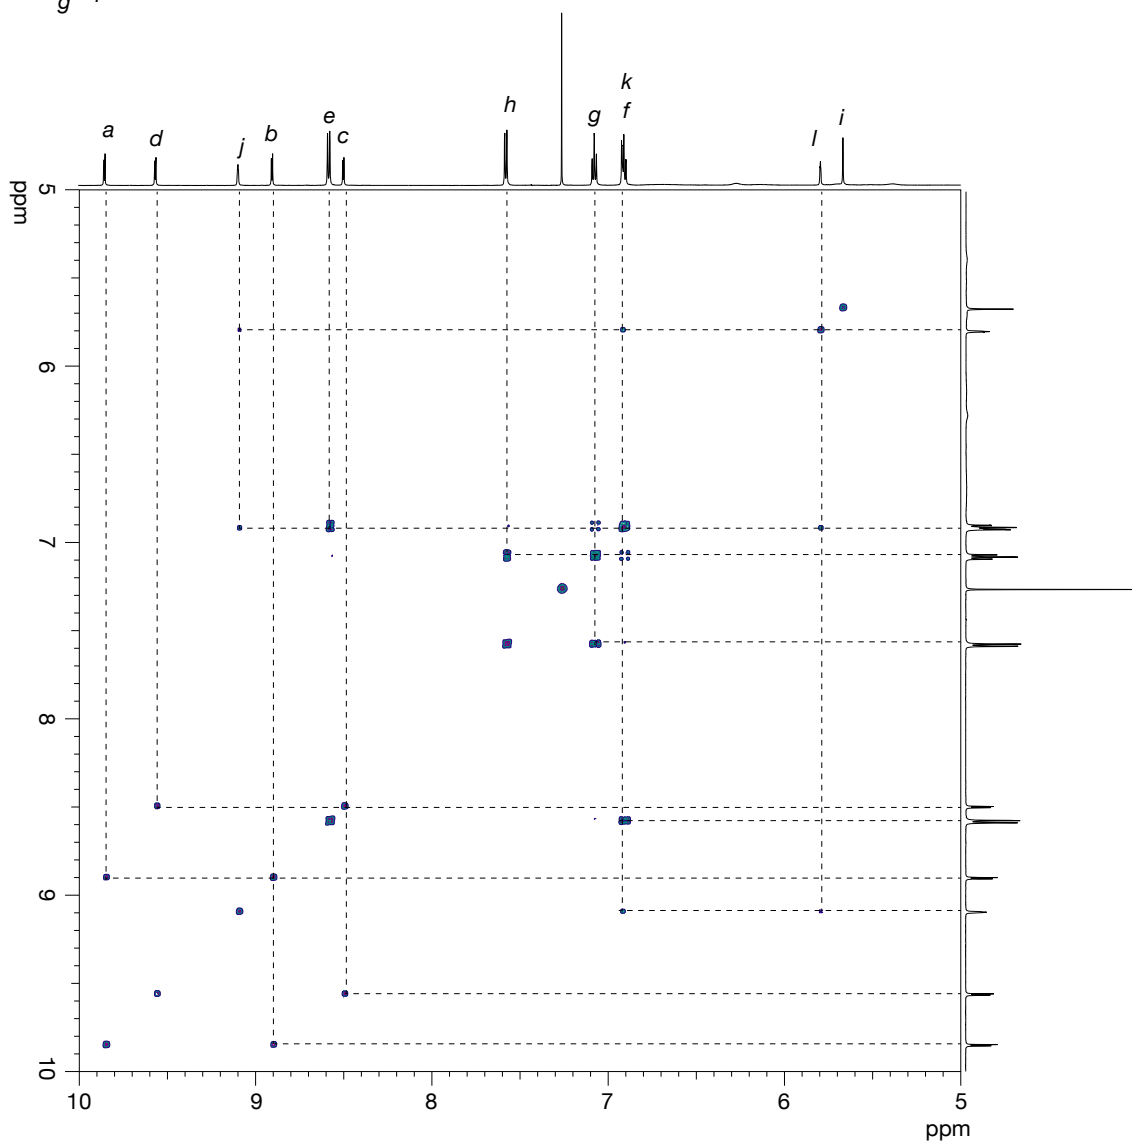

**Figure S14.** COSY spectrum of  $\text{Ce}(\text{L})_2$  in  $\text{CDCl}_3$ .

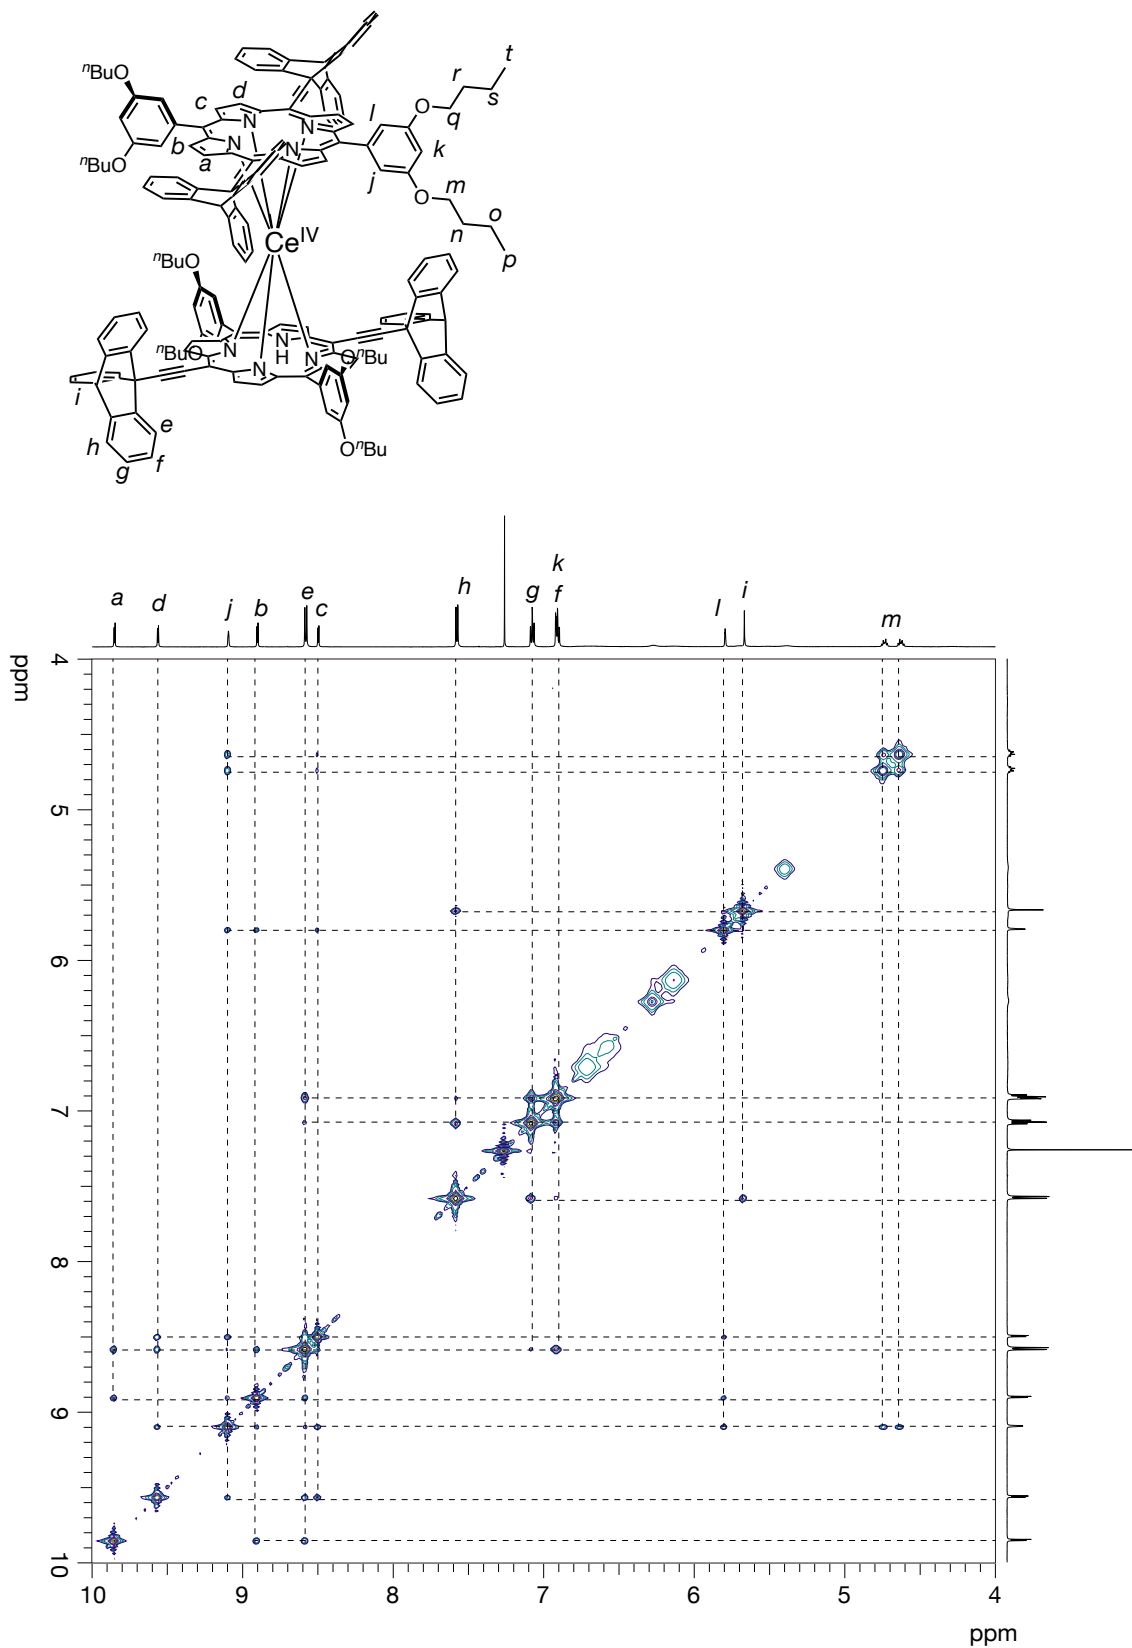

Figure S15. NOESY spectrum of  $Ce(1)_2$ .

## Single crystal X-ray analysis of Ce(L)<sub>2</sub>

Single crystals suitable for the single crystal X-ray analysis were obtained by slow diffusion of MeOH into a CHCl<sub>3</sub> solution of Ce(L)<sub>2</sub>. The single crystal X-ray diffraction data was collected on a Rigaku VariMax RAPID (1.2kW) diffractometer equipped with confocal mirror optics MoK $\alpha$  radiation and IP detector. The collected X-ray diffraction data were processed using the Rapid Auto software. The structure was solved by SHELXT<sup>[4]</sup> and refined by full-matrix least-squares on *F*<sup>2</sup> using the SHELXL-2019/2<sup>[5]</sup> and Olex2.<sup>[6]</sup> The geometrical restraints, i.e. DFIX, SIMU and RIGU on peripheral alkyl chains as well as the triptycene moiety, were used in the refinements. The Solvent Mask function of Olex2 was employed to remove the disordered chloroform and methanol molecules which were used for the preparation of single crystals since the diffraction of these crystalline solvent molecules was weak and the electron density of solvent molecules hardly be modeled.

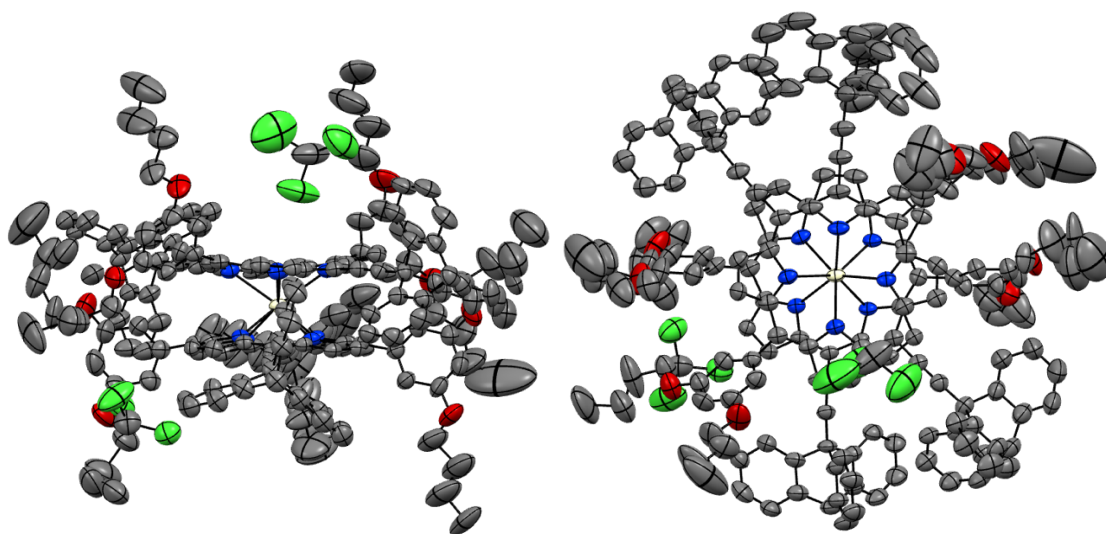

**Figure S16.** ORTEP representation of a side view (left) and a top view (right) of Ce(L)<sub>2</sub>. Thermal ellipsoids are drawn at 30% probability. Hydrogen atoms and solvent molecules are omitted for clarity. (CCDC deposit number: 2258829)

**Table S1.** Crystal data and structure refinement for Ce(L)<sub>2</sub> (CCDC deposit number: 2258829)

|                                   |                                                                                                                                |
|-----------------------------------|--------------------------------------------------------------------------------------------------------------------------------|
| Empirical formula                 | C186 H154 Ce Cl6 N8 O8                                                                                                         |
| Formula weight                    | 2981.98                                                                                                                        |
| Temperature                       | 103.15 K                                                                                                                       |
| Wavelength                        | 0.71075 Å                                                                                                                      |
| Crystal system                    | trigonal                                                                                                                       |
| Space group                       | R-3 (#148)                                                                                                                     |
| Unit cell dimensions              | a = 41.9814(5) Å<br>b = 41.9814(8) Å<br>c = 53.6321(10) Å<br>$\alpha = 90^\circ$<br>$\beta = 90^\circ$<br>$\gamma = 120^\circ$ |
| Volume                            | 81860(3) Å <sup>3</sup>                                                                                                        |
| Z                                 | 18                                                                                                                             |
| Density (calculated)              | 1.089 g/cm <sup>3</sup>                                                                                                        |
| Absorption coefficient            | 0.392 mm <sup>-1</sup>                                                                                                         |
| F(000)                            | 27900.0                                                                                                                        |
| Crystal size                      | 0.2 x 0.19 x 0.14 mm <sup>3</sup>                                                                                              |
| Theta range for data collection   | 1.887 to 25.351 °                                                                                                              |
| Index ranges                      | -50 ≤ h ≤ 50, -50 ≤ k ≤ 50, -64 ≤ l ≤ 64                                                                                       |
| Reflections collected             | 391865                                                                                                                         |
| Independent reflections           | 33301 [R <sub>int</sub> = 0.0679, R <sub>sigma</sub> = 0.0295]                                                                 |
| Completeness to theta = 25.351°   | 99.9 %                                                                                                                         |
| Absorption correction             | Semi-empirical from equivalents                                                                                                |
| Max. and min. transmission        | 0.644 and 1.000                                                                                                                |
| Refinement method                 | Full-matrix least-square on F <sup>2</sup>                                                                                     |
| Data / restraints / parameters    | 33301 / 239 / 1926                                                                                                             |
| Goodness-of-fit on F <sup>2</sup> | 1.170                                                                                                                          |
| Final R indices [I > 2σ(I)]       | R1 = 0.0860, wR2 = 0.2678                                                                                                      |
| R indices (all data)              | R1 = 0.1018, wR2 = 0.2866                                                                                                      |
| Largest diff. peak and hole       | 1.77 and -1.08 e.Å <sup>-3</sup>                                                                                               |

## References

- [1] G. Rapenne, G. Jimenez-Bueno, *Tetrahedron* **2007**, *63*, 7018.
- [2] M. Calik, F. Auras, L. M. Salonen, K. Bader, I. Grill, M. Handloser, D. D. Medina, M. Dogru, F. Löbermann, D. Trauner, A. Hartschuh, T. Bein, *J. Am. Chem. Soc.* **2014**, *136*, 17802.
- [3] S. Tanaka, M. Shirakawa, K. Kaneto, M. Takeuchi, S. Shinkai, *Langmuir*, **2005**, *21*, 2163.
- [4] G. M. Sheldrick, *Acta Cryst.*, **2015**, A71, 3-8.
- [5] G. M. Sheldrick, *Acta Cryst.*, **2015**, C71, 3-8.
- [6] O. V. Dolomanov, L. J. Bourhis, R. J. Gildea, J. A. K. Howard, H. Puschmann, *J. Appl. Cryst.*, **2009**, *42*, 339.
